# Supplementary material for: 1-Alkyl-3-methylimidazolium cation binding preferences in hexafluorophosphate ionic liquid clusters determined using competitive TCID measurements and theoretical calculations
Source: Royal Society of Chemistry journal article supplement (doi:10.1039/d1cp02928b), 2021-01-01

*Electronic supplementary information for...*

## 1-Alkyl-3-Methylimidazolium Cation Binding Preferences in Hexafluorophosphate Ionic Liquid Clusters Determined Using Competitive TCID Measurements and Theoretical Calculations

H. A. Roy and M. T. Rodgers\*

*Department of Chemistry, Wayne State University, Detroit, MI, 48202, USA*

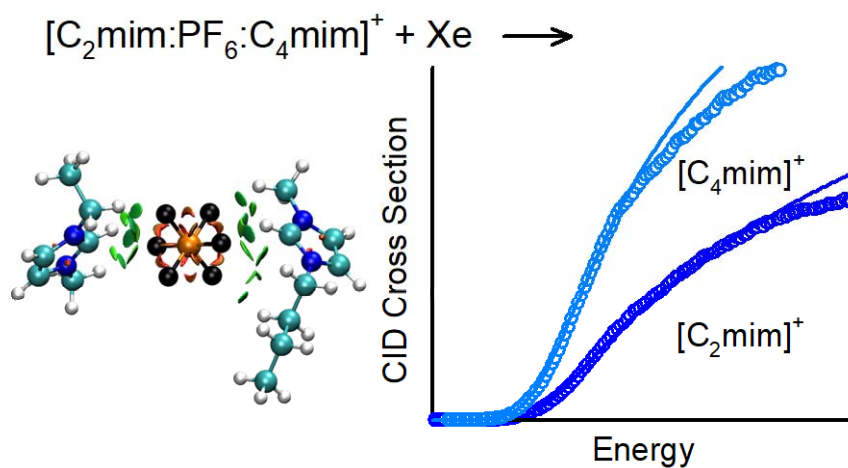

## Table of Contents

| Content Description                                                                                                                                                                                                                       | Page(s) |
|-------------------------------------------------------------------------------------------------------------------------------------------------------------------------------------------------------------------------------------------|---------|
| <b>Table S1.</b> CID Fragments of the $[C_{n-2}mim:PF_6:C_nmim]^+$ Clusters                                                                                                                                                               | S3      |
| <b>Table S2.</b> Geometric Parameters of the $[C_nmim]^+$ Cations                                                                                                                                                                         | S4      |
| <b>Table S3.</b> Geometric Parameters of the $[PF_6]^-$ and $[BF_4]^-$ Anions                                                                                                                                                             | S4      |
| <b>Table S4.</b> Geometric Parameters of the $(C_nmim:PF_6)$ Ion Pairs                                                                                                                                                                    | S5      |
| <b>Table S5.</b> Geometric Parameters of the $[C_{n-2}mim:PF_6:C_nmim]^+$ Clusters                                                                                                                                                        | S6      |
| <b>Table S6.</b> Threshold Dissociation Energies and Fitting Parameters of $[C_{n-2}mim:PF_6:C_nmim]^+$ Clusters from Independent Analyses using <b>Eqn (3)</b>                                                                           | S7      |
| <b>Table S7.</b> Vibrational Frequencies and Average Vibrational Energies of the $[C_{n-2}mim:PF_6:C_nmim]^+$ Clusters, $[C_nmim]^+$ Cations, and $(C_nmim:PF_6)$ Ion Pairs                                                               | S8-S9   |
| <b>Table S8.</b> Rotational Constants of $[C_{n-2}mim:PF_6:C_nmim]^+$ Clusters and PSL TSs                                                                                                                                                | S10     |
| <b>Figure Captions</b>                                                                                                                                                                                                                    | S11-S12 |
| <b>Figure S1.</b> Nomenclature used for $[C_nmim]^+$ , $(C_nmim:PF_6)$ , and $[C_{n-2}mim:PF_6:C_nmim]^+$                                                                                                                                 | S13-S16 |
| <b>Figure S2.</b> Optimized geometries of the ground conformers of the $[C_nmim]^+$ cations at B3LYP/6-311+G(d,p) and M06-2X(d,p)                                                                                                         | S17     |
| <b>Figure S3.</b> Optimized geometries of the ground conformers of the $(C_nmim:PF_6)$ ion pairs at B3LYP/6-311+G(d,p) and M06-2X(d,p)                                                                                                    | S18     |
| <b>Figure S4.</b> Optimized geometries of the ground conformers of the $[C_{n-2}mim:PF_6:C_nmim]^+$ clusters at B3LYP/6-311+G(d,p) and M06-2X/6-311+G(d,p)                                                                                | S19     |
| <b>Figure S5.</b> Optimized geometries and free energies of the $[C_2mim:PF_6:C_4mim]^+$ clusters                                                                                                                                         | S20     |
| <b>Figure S6.</b> Optimized geometries and free energies of the $[C_4mim:PF_6:C_6mim]^+$ clusters                                                                                                                                         | S21     |
| <b>Figure S7.</b> Optimized geometries and free energies of the $[C_6mim:PF_6:C_8mim]^+$ clusters                                                                                                                                         | S22     |
| <b>Figure S8.</b> Electrostatic potential maps of the $[C_{n-2}mim:PF_6:C_nmim]^+$ clusters                                                                                                                                               | S23     |
| <b>Figure S9.</b> Comparisons of the B3LYP, B3LYP-GD3BJ, and M06-2X computed 0 K BDEs verses measured TCID dissociation energies of the $[C_{n-2}mim:PF_6:C_nmim]^+$ clusters                                                             | S24     |
| <b>Figure S10.</b> Comparisons of the B3LYP, B3LYP-GD3BJ, and M06-2X computed relative BDEs of the $[C_{n-2}mim:PF_6:C_nmim]^+$ clusters, relative IPEs of the $(C_nmim:PF_6)$ ion pairs, and experimentally determined 0 K $\Delta$ BDEs | S25     |
| <b>Figure S11.</b> Comparisons of the B3LYP, B3LYP-GD3BJ, and M06-2X computed vs. TCID 0 K BDEs of the $[2C_nmim:PF_6]^+$ clusters for $n = 2, 4, 6,$ and $8$ (in kJ/mol).                                                                | S26     |

**Table S1.** CID Fragments of the  $[\text{C}_{n-2}\text{mim}:\text{PF}_6:\text{C}_n\text{mim}]^+$  Cluster Ions.<sup>a</sup>

| precursor ion                                               | m/z<br>(Da/e) | symbol | 1° fragment ion            | 2° fragment ions                     | neutral loss(es)                       |
|-------------------------------------------------------------|---------------|--------|----------------------------|--------------------------------------|----------------------------------------|
| $[\text{C}_2\text{mim}:\text{PF}_6:\text{C}_4\text{mim}]^+$ | 395           |        |                            |                                      |                                        |
|                                                             | 139           | ●      | $[\text{C}_4\text{mim}]^+$ |                                      | ( $\text{C}_2\text{mim}:\text{PF}_6$ ) |
|                                                             | 111           | ●      | $[\text{C}_2\text{mim}]^+$ |                                      | ( $\text{C}_4\text{mim}:\text{PF}_6$ ) |
|                                                             | 83            | □      |                            | $[\text{C}_4\text{H}_7\text{N}_2]^+$ | $\text{C}_4\text{H}_8$                 |
|                                                             | 57            | △      |                            | $[\text{C}_4\text{H}_9]^+$           | $\text{C}_4\text{H}_6\text{N}_2$       |
| $[\text{C}_4\text{mim}:\text{PF}_6:\text{C}_6\text{mim}]^+$ | 451           |        |                            |                                      |                                        |
|                                                             | 167           | ●      | $[\text{C}_6\text{mim}]^+$ |                                      | ( $\text{C}_4\text{mim}:\text{PF}_6$ ) |
|                                                             | 139           | ●      | $[\text{C}_4\text{mim}]^+$ |                                      | ( $\text{C}_6\text{mim}:\text{PF}_6$ ) |
|                                                             | 83            | □      |                            | $[\text{C}_4\text{H}_7\text{N}_2]^+$ | $\text{C}_6\text{H}_{12}$              |
|                                                             | 57            | △      |                            | $[\text{C}_4\text{H}_9]^+$           | $\text{C}_6\text{H}_{10}\text{N}_2$    |
| $[\text{C}_6\text{mim}:\text{PF}_6:\text{C}_8\text{mim}]^+$ | 507           |        |                            |                                      |                                        |
|                                                             | 195           | ●      | $[\text{C}_8\text{mim}]^+$ |                                      | ( $\text{C}_6\text{mim}:\text{PF}_6$ ) |
|                                                             | 167           | ●      | $[\text{C}_6\text{mim}]^+$ |                                      | ( $\text{C}_8\text{mim}:\text{PF}_6$ ) |
|                                                             | 83            | □      |                            | $[\text{C}_4\text{H}_7\text{N}_2]^+$ | $\text{C}_8\text{H}_{16}$              |
|                                                             | 71            | ▽      |                            | $[\text{C}_5\text{H}_{11}]^+$        | $\text{C}_7\text{H}_{12}\text{N}_2$    |
|                                                             | 57            | △      |                            | $[\text{C}_4\text{H}_9]^+$           | $\text{C}_8\text{H}_{14}\text{N}_2$    |
|                                                             | 43            | ○      |                            | $[\text{C}_3\text{H}_7]^+$           | $\text{C}_9\text{H}_{12}\text{N}_2$    |

<sup>a</sup>The elemental compositions of the  $[\text{C}_n\text{mim}]^+$  cations are  $[\text{C}_2\text{mim}]^+ = [\text{C}_6\text{H}_{11}\text{N}_2]^+$ ,  $[\text{C}_4\text{mim}]^+ = [\text{C}_8\text{H}_{15}\text{N}_2]^+$ ,  $[\text{C}_6\text{mim}]^+ = [\text{C}_{10}\text{H}_{19}\text{N}_2]^+$ , and  $[\text{C}_8\text{mim}]^+ = [\text{C}_{12}\text{H}_{23}\text{N}_2]^+$ .

**Table S2.** Geometric Parameters of the B3LYP, B3LYP-GD3BJ, and M06-2X Ground Conformers of the  $[C_n\text{mim}]^+$  Cations<sup>a</sup>

| cation              | theory      | a1     | a2     | a3     | a4    | a5    | a6    | a7    |
|---------------------|-------------|--------|--------|--------|-------|-------|-------|-------|
| $[C_2\text{mim}]^+$ | B3LYP       | -104.6 |        |        |       |       |       |       |
|                     | B3LYP-GD3BJ | -104.6 |        |        |       |       |       |       |
|                     | M06-2X      | -108.0 |        |        |       |       |       |       |
| $[C_4\text{mim}]^+$ | B3LYP       | -100.1 | -179.7 | -179.6 |       |       |       |       |
|                     | B3LYP-GD3BJ | -103.5 | 61.9   | 177.3  |       |       |       |       |
|                     | M06-2X      | -106.2 | 59.1   | 175.5  |       |       |       |       |
| $[C_6\text{mim}]^+$ | B3LYP       | -102.1 | 180.0  | 180.0  | 180.0 | 180.0 |       |       |
|                     | B3LYP-GD3BJ | -104.5 | 60.9   | 176.4  | 179.5 | 179.7 |       |       |
|                     | M06-2X      | -106.4 | 58.9   | 174.0  | 179.2 | 179.4 |       |       |
| $[C_8\text{mim}]^+$ | B3LYP       | -103.0 | 179.3  | 179.8  | 179.5 | 180.0 | 179.7 | 180.0 |
|                     | B3LYP-GD3BJ | -103.4 | 60.5   | 176.1  | 179.5 | 179.6 | 180.0 | 179.9 |
|                     | M06-2X      | -104.9 | 59.2   | 174.7  | 180.0 | 179.8 | 179.6 | 180.0 |

<sup>a</sup>The torsion angles are given in ( $^\circ$ ) and describe the 1-alkyl dihedral angles:  $a_1 = \angle C_2N_1C_1'C_2'$ ,  $a_2 = \angle N_1C_1'C_2'C_3'$ ,  $a_3 = \angle C_1'C_2'C_3'C_4'$ ,  $a_4 = \angle C_2'C_3'C_4'C_5'$ ,  $a_5 = \angle C_3'C_4'C_5'C_6'$ ,  $a_6 = \angle C_4'C_5'C_6'C_7'$ , and  $a_7 = \angle C_5'C_6'C_7'C_8'$  as shown in **Figure S1**. The optimized structures were determined using the density functional indicated with a 6-311+G(d,p) basis set and are shown in **Figure 4**.

**Table S3.** Geometric Parameters of B3LYP, B3LYP-GD3BJ, and M06-2X Optimized Geometries of the  $[\text{BF}_4]^-$  and  $[\text{PF}_6]^-$  Anions<sup>a</sup>

| theory      | $[\text{PF}_6]^-$    |                                 |                          |                            | $[\text{BF}_4]^-$    |                                 |                      |
|-------------|----------------------|---------------------------------|--------------------------|----------------------------|----------------------|---------------------------------|----------------------|
|             | P-F ( $\text{\AA}$ ) | $\angle\text{FPF}$ ( $^\circ$ ) | cis F-F ( $\text{\AA}$ ) | trans F-F ( $\text{\AA}$ ) | B-F ( $\text{\AA}$ ) | $\angle\text{FBF}$ ( $^\circ$ ) | F-F ( $\text{\AA}$ ) |
| B3LYP       | 1.646                | 90.0                            | 2.327                    | 3.291                      | 1.417                | 109.5                           | 2.314                |
| B3LYP-GD3BJ | 1.645                | 90.0                            | 2.327                    | 3.291                      | 1.417                | 109.5                           | 2.314                |
| M06-2X      | 1.628                | 90.0                            | 2.303                    | 3.257                      | 1.410                | 109.5                           | 2.302                |

<sup>a</sup>The optimized structures were determined using the density functional indicated with a 6-311+G(d,p) basis set and are shown in **Figure 4**. Ideal tetrahedral geometry observed for  $[\text{BF}_4]^-$  and ideal octahedral geometry observed for  $[\text{PF}_6]^-$  resulting in identical bond lengths and bond angles in the respective anion.

**Table S4.** Geometric Parameters of the B3LYP, B3LYP-GD3BJ, and M06-2X Ground Conformers of the (C<sub>n</sub>mim:PF<sub>6</sub>) Ion Pairs<sup>a</sup>

| ion pair                              | theory      | $\angle\text{C2N3C1''H}$ | $\mathbf{a1}^b$ | $\angle\text{C2HP}$ | $\mathbf{b}^c$ | $\mathbf{b1}^d$ |
|---------------------------------------|-------------|--------------------------|-----------------|---------------------|----------------|-----------------|
| (C <sub>2</sub> mim:PF <sub>6</sub> ) | B3LYP       | -4.8                     | -93.9           | 119.7               | -3.9           | 46.6            |
|                                       | B3LYP-GD3BJ | 28.4                     | 113.0           | 102.5               | -1.2           | 58.6            |
|                                       | M06-2X      | -22.8                    | -116.8          | 92.6                | -1.3           | -65.6           |
| (C <sub>4</sub> mim:PF <sub>6</sub> ) | B3LYP       | -16.7                    | -94.1           | 120.8               | 0.5            | 49.4            |
|                                       | B3LYP-GD3BJ | 14.7                     | -103.3          | 110.9               | -0.2           | -56.2           |
|                                       | M06-2X      | -24.6                    | -112.9          | 93.8                | -1.3           | -64.0           |
| (C <sub>6</sub> mim:PF <sub>6</sub> ) | B3LYP       | 16.2                     | -103.5          | 121.3               | 0.1            | -49.7           |
|                                       | B3LYP-GD3BJ | 1.8                      | -122.8          | 116.0               | -5.9           | -47.3           |
|                                       | M06-2X      | -25.1                    | -111.8          | 94.0                | -1.1           | -63.9           |
| (C <sub>8</sub> mim:PF <sub>6</sub> ) | B3LYP       | 15.4                     | -103.9          | 120.4               | -0.0           | -50.1           |
|                                       | B3LYP-GD3BJ | 16.1                     | -78.3           | 114.4               | -7.7           | -52.2           |
|                                       | M06-2X      | -24.9                    | -111.4          | 93.9                | -1.2           | -63.9           |

  

| ion pair                              | theory      | C1'H-F | C2H-F        | C1''H-F | C2-F  | C2-P  |
|---------------------------------------|-------------|--------|--------------|---------|-------|-------|
| (C <sub>2</sub> mim:PF <sub>6</sub> ) | B3LYP       | 2.264  | 2.273, 2.103 | 2.321   | 2.766 | 3.568 |
|                                       | B3LYP-GD3BJ | 2.445  | 2.272, 2.311 | 2.673   | 2.691 | 3.462 |
|                                       | M06-2X      | 2.389  | 2.319, 2.372 | 2.590   | 2.683 | 3.382 |
| (C <sub>4</sub> mim:PF <sub>6</sub> ) | B3LYP       | 2.275  | 2.169, 2.202 | 2.255   | 2.758 | 3.575 |
|                                       | B3LYP-GD3BJ | 2.418  | 2.221, 2.252 | 2.265   | 2.672 | 3.500 |
|                                       | M06-2X      | 2.354  | 2.322, 2.362 | 2.613   | 2.678 | 3.393 |
| (C <sub>6</sub> mim:PF <sub>6</sub> ) | B3LYP       | 2.498  | 2.154, 2.222 | 2.273   | 2.798 | 3.591 |
|                                       | B3LYP-GD3BJ | 2.447  | 2.190, 2.208 | 2.230   | 2.702 | 3.524 |
|                                       | M06-2X      | 2.349  | 2.313, 2.378 | 2.633   | 2.677 | 3.397 |
| (C <sub>8</sub> mim:PF <sub>6</sub> ) | B3LYP       | 2.493  | 2.175, 2.216 | 2.281   | 2.779 | 3.584 |
|                                       | B3LYP-GD3BJ | 3.405  | 2.075, 2.603 | 2.114   | 2.667 | 3.594 |
|                                       | M06-2X      | 2.356  | 2.311, 2.384 | 2.627   | 2.678 | 3.398 |

<sup>a</sup>Bond and dihedral angles are given in degrees (°), bond distances are given in Angstroms (Å). Optimized structures were determined using the density functional indicated with a 6-311+G(d,p) basis set. See **Figure S1** for additional details regarding the definitions of the dihedral angles. <sup>b</sup>First 1-alkyl dihedral angle  $\mathbf{a1} \equiv \angle\text{C2N1C1'C2'}$ . <sup>c</sup>Binding site dihedral angle defined as  $\mathbf{b} \equiv \angle(\text{C2}, \odot, \odot+\text{CP}, \text{P})$  where  $\odot$  denotes the centroid of the imidazolium ring. <sup>d</sup>Binding orientation dihedral angle defined as  $\mathbf{b1} \equiv \angle\text{C1''N3C2P}$ .

**Table S5.** Geometric Parameters of the B3LYP, B3LYP-GD3BJ, and M06-2X Ground Conformers of the  $[C_{n-2}\text{mim:PF}_6:C_n\text{mim}]^+$  Clusters<sup>a</sup>

| system                                               | theory      | $\angle\text{C2N3C1''H}$ | $\text{a1}^b$  | $\angle\text{C2HP}$ | $\text{b}^c$  | $\text{b1}^d$ | $\text{b2}^e$ |
|------------------------------------------------------|-------------|--------------------------|----------------|---------------------|---------------|---------------|---------------|
| $[\text{C}_2\text{mim:PF}_6:\text{C}_4\text{mim}]^+$ | B3LYP       | 9.8                      | 102.8          | 139.4               | -0.6          | -35.4         | 81.4          |
|                                                      |             | -14.6                    | 100.9          | 137.2               | 1.5           | 38.9          |               |
|                                                      | B3LYP-GD3BJ | -18.6                    | 95.1           | 101.5               | -6.5          | -58.7         | 84.4          |
|                                                      |             | -17.6                    | 106.0          | 110.2               | 0.2           | 59.8          |               |
|                                                      | M06-2X      | 21.4                     | -119.6         | 87.9                | -4.0          | 69.7          | -74.2         |
| $[\text{C}_4\text{mim:PF}_6:\text{C}_6\text{mim}]^+$ | B3LYP       | -16.2                    | -118.1         | 91.0                | -0.8          | -69.8         |               |
|                                                      |             | -10.3                    | -99.9          | 136.0               | -0.3          | 38.2          | -51.2         |
|                                                      | B3LYP-GD3BJ | 8.6                      | 99.8           | 132.0               | -2.7          | -40.0         |               |
|                                                      |             | -18.4                    | 106.5          | 110.5               | 0.4           | 59.1          | 93.4          |
|                                                      |             | -17.2                    | 106.0          | 109.4               | 0.0           | 59.9          |               |
|                                                      | M06-2X      | 17.1                     | 118.3          | 90.9                | -0.7          | 69.7          | 75.4          |
| $[\text{C}_6\text{mim:PF}_6:\text{C}_8\text{mim}]^+$ | B3LYP       | 21.4                     | -114.2         | 88.5                | -4.7          | 68.6          |               |
|                                                      |             | -11.0                    | -100.4         | 135.4               | -1.1          | 38.5          | -83.0         |
|                                                      | B3LYP-GD3BJ | 14.2                     | -102.6         | 137.5               | 1.5           | -38.7         |               |
|                                                      |             | 18.7                     | -106.2         | 110.1               | 1.2           | -59.8         | 65.1          |
|                                                      |             | -17.5                    | 98.3           | 114.4               | 0.7           | 56.6          |               |
|                                                      | M06-2X      | -20.6                    | 111.3          | 88.0                | -4.4          | -69.5         | -63.1         |
|                                                      |             | 21.9                     | -110.8         | 88.9                | -5.3          | 67.8          |               |
| system                                               | theory      | $\text{C1''H-F}$         | $\text{C2H-F}$ | $\text{C1''H-F}$    | $\text{C2-F}$ | $\text{C2-P}$ |               |
| $[\text{C}_2\text{mim:PF}_6:\text{C}_4\text{mim}]^+$ | B3LYP       | 2.439                    | 2.193, 2.209   | 2.407               | 3.276         | 3.811         |               |
|                                                      |             | 2.673                    | 2.157, 2.285   | 2.415               | 3.273         | 3.811         |               |
|                                                      | B3LYP-GD3BJ | 2.399                    | 2.504, 2.311   | 2.663               | 2.908         | 3.548         |               |
|                                                      |             | 2.573                    | 2.340, 2.322   | 2.364               | 2.866         | 3.577         |               |
|                                                      | M06-2X      | 2.550                    | 2.563, 2.424   | 2.727               | 2.839         | 3.429         |               |
| $[\text{C}_4\text{mim:PF}_6:\text{C}_6\text{mim}]^+$ | B3LYP       | 2.474                    | 2.436, 2.455   | 2.655               | 2.809         | 3.427         |               |
|                                                      |             | 2.443                    | 2.206, 2.234   | 2.415               | 3.181         | 3.781         |               |
|                                                      | B3LYP-GD3BJ | 2.462                    | 2.272, 2.212   | 2.410               | 3.133         | 3.760         |               |
|                                                      |             | 2.523                    | 2.311, 2.358   | 2.386               | 3.579         | 3.579         |               |
|                                                      |             | 2.558                    | 2.311, 2.390   | 2.390               | 3.578         | 3.578         |               |
|                                                      | M06-2X      | 2.459                    | 2.418, 2.481   | 2.684               | 3.429         | 3.429         |               |
| $[\text{C}_6\text{mim:PF}_6:\text{C}_8\text{mim}]^+$ | B3LYP       | 2.515                    | 2.548, 2.430   | 2.704               | 3.432         | 3.432         |               |
|                                                      |             | 2.479                    | 2.204, 2.245   | 2.378               | 3.214         | 3.790         |               |
|                                                      | B3LYP-GD3BJ | 2.669                    | 2.146, 2.287   | 2.411               | 3.270         | 3.807         |               |
|                                                      |             | 2.510                    | 2.294, 2.450   | 2.448               | 2.795         | 3.585         |               |
|                                                      |             | 2.560                    | 2.261, 2.387   | 2.437               | 2.889         | 3.617         |               |
|                                                      | M06-2X      | 2.496                    | 2.569, 2.416   | 2.688               | 2.837         | 3.429         |               |
|                                                      |             | 2.491                    | 2.551, 2.405   | 2.685               | 2.837         | 3.430         |               |

<sup>a</sup>Bond and dihedral angles are given in ( $^\circ$ ). The optimized structures were determined using the density functional indicated with a 6-311+G(d,p) basis set and are shown in **Figure 6** and **Figures S2-4**. See **Figure S1** for dihedral definitions. <sup>b</sup>First 1-alkyl dihedral angle  $\text{a1} \equiv \angle\text{C2N1C1''C2'}$ . <sup>c</sup>Binding site dihedral angle defined as  $\text{b} \equiv \angle(\text{C2}, \text{C}, \text{C}+\text{CP}, \text{P})$ , where C denotes the centroid of the imidazolium ring. <sup>d</sup>Binding orientation dihedral angle defined as  $\text{b1} \equiv \angle\text{C1''N3C2P}$ . <sup>e</sup>Relative cation binding orientation dihedral angle defined as  $\text{b2} \equiv \angle\text{C1''N1N1C1'}$ .

**Table S6.** Fitting Parameters of **eqn (3)**, Threshold Dissociation Energies at 0 K, and Entropies of Activation at 1000 K of  $[\text{C}_{n-2}\text{mim}:\text{PF}_6:\text{C}_n\text{mim}]^+$  Clusters Based on Independent Fitting of the Two Primary Dissociation Pathways<sup>a</sup>

| system                                                      | Ionic Product              | $E_0(\text{PSL})^b$<br>(eV) | $\Delta S^\ddagger(\text{PSL})^b$<br>(J mol <sup>-1</sup> K <sup>-1</sup> ) | $\sigma^b$ | $n$       | $E_0^c$<br>(eV) | kinetic shift<br>(eV) |
|-------------------------------------------------------------|----------------------------|-----------------------------|-----------------------------------------------------------------------------|------------|-----------|-----------------|-----------------------|
| $[\text{C}_2\text{mim}:\text{PF}_6:\text{C}_4\text{mim}]^+$ | $[\text{C}_2\text{mim}]^+$ | 1.17 (0.05)                 | 18 (4)                                                                      | 28.0 (1.9) | 1.3 (0.1) | 2.07 (0.08)     | 0.90                  |
|                                                             | $[\text{C}_4\text{mim}]^+$ | 1.15 (0.05)                 | 17 (4)                                                                      | 60.2 (2.6) | 1.1 (0.1) | 2.03 (0.08)     | 0.88                  |
| $[\text{C}_4\text{mim}:\text{PF}_6:\text{C}_6\text{mim}]^+$ | $[\text{C}_4\text{mim}]^+$ | 1.14 (0.07)                 | 17 (4)                                                                      | 34.7 (3.0) | 1.2 (0.1) | 2.31 (0.09)     | 1.16                  |
|                                                             | $[\text{C}_6\text{mim}]^+$ | 1.15 (0.06)                 | 24 (4)                                                                      | 44.0 (3.1) | 1.3 (0.1) | 2.31 (0.09)     | 1.17                  |
| $[\text{C}_6\text{mim}:\text{PF}_6:\text{C}_8\text{mim}]^+$ | $[\text{C}_6\text{mim}]^+$ | 1.05 (0.05)                 | 9 (4)                                                                       | 35.9 (1.5) | 1.4 (0.1) | 2.63 (0.10)     | 1.57                  |
|                                                             | $[\text{C}_8\text{mim}]^+$ | 1.02 (0.06)                 | 5 (4)                                                                       | 39.9 (1.4) | 1.4 (0.1) | 2.57 (0.10)     | 1.55                  |

<sup>a</sup>Present results, uncertainties are listed in parentheses. <sup>b</sup>Average values for loose PSL TS. <sup>c</sup>No RRKM analysis.

**Table S7.** Vibrational Frequencies and Average Vibrational Energies of the  $[\text{C}_{n-2}\text{mim}:\text{PF}_6:\text{C}_n\text{mim}]^+$  Clusters,  $[\text{C}_n\text{mim}]^+$  Cations, and  $(\text{C}_n\text{mim}:\text{PF}_6)$  Ion Pairs<sup>a</sup>

| system                                                      | $E_{\text{int}}$ , eV <sup>b</sup> | vibrational frequencies (cm <sup>-1</sup> )                                                                                                                                                                                                                                                                                                                                                                                                                                                                                                                                                                                                                                                                                                                                                                                                                                                                                                                                                                                                                                                                                                                                 |
|-------------------------------------------------------------|------------------------------------|-----------------------------------------------------------------------------------------------------------------------------------------------------------------------------------------------------------------------------------------------------------------------------------------------------------------------------------------------------------------------------------------------------------------------------------------------------------------------------------------------------------------------------------------------------------------------------------------------------------------------------------------------------------------------------------------------------------------------------------------------------------------------------------------------------------------------------------------------------------------------------------------------------------------------------------------------------------------------------------------------------------------------------------------------------------------------------------------------------------------------------------------------------------------------------|
| $[\text{C}_2\text{mim}:\text{PF}_6:\text{C}_4\text{mim}]^+$ | 0.79 (0.06)                        | 5, 9, 12, 18, 23, 30, 33, 39, 41, 50, 58, 63, 74, 79, 88, 106, 109, 119, 120, 146, 202, 209, 235, 242, 247, 278, 282, 295, 298(2), 322, 381, 406, 426, 438, 439, 441, 446, 524(2), 528, 534, 540, 595, 629, 636(2), 666, 668, 685, 700, 735, 745, 748(2), 804, 806, 810, 828, 833, 867, 868, 901, 908, 917, 951, 964, 1012, 1037, 1038, 1044, 1045, 1056, 1103, 1107, 1108, 1121(2), 1129, 1139, 1153, 1156(2), 1176, 1177, 1239, 1272, 1297, 1302, 1312, 1321, 1340, 1347, 1349, 1383, 1390, 1401, 1414(2), 1421, 1426, 1445, 1449, 1463, 1464, 1492, 1493, 1494, 1495, 1497(2), 1502, 1504, 1511, 1512, 1513, 1516, 1595(2), 1603, 1605, 3012, 3022, 3028, 3042, 3043, 3065(2), 3066, 3078(2), 3091, 3099, 3107, 3118, 3128, 3138, 3142(2), 3168(2), 3275, 3276, 3284, 3286, 3294(2)                                                                                                                                                                                                                                                                                                                                                                                      |
| $[\text{C}_4\text{mim}:\text{PF}_6:\text{C}_6\text{mim}]^+$ | 0.94 (0.07)                        | 5, 8, 10, 16, 19, 21, 30, 37, 38, 43, 49, 51, 59, 65, 72, 76, 79, 91, 102, 111, 113, 121, 123, 141, 146, 205, 219, 240, 243, 246, 249, 282(2), 286, 295(2), 299, 317, 409, 412, 435, 438(2), 441, 446, 450, 523, 525, 528, 534, 540, 628(2), 637, 638, 669, 670, 684, 735, 739, 742, 744, 747, 748, 751, 802, 804, 809, 829, 831, 866, 867, 897, 900, 903, 907, 917, 949, 1003, 1006, 1013, 1037, 1038(2), 1043, 1045, 1051, 1058, 1066, 1108(2), 1121, 1122, 1130, 1136, 1154, 1155, 1156, 1157, 1175, 1177, 1220, 1238, 1263, 1272, 1295, 1301, 1302, 1320, 1322, 1327, 1335, 1336, 1339, 1350(2), 1381, 1386, 1399, 1400, 1403, 1416, 1417, 1418, 1422, 1447, 1448, 1464(2), 1487, 1489, 1491, 1494, 1495, 1496, 1497, 1501, 1502, 1503, 1506, 1511(2), 1512, 1517(2), 1595, 1596, 1604, 1605, 2999, 3004, 3012, 3013, 3018, 3021(2), 3024, 3029, 3032, 3038, 3048, 3061, 3063, 3065(2), 3074(2), 3084, 3090, 3093, 3101, 3129(2), 3142(2), 3168, 3169, 3276(2), 3288, 3289, 3294, 3295                                                                                                                                                                                  |
| $[\text{C}_6\text{mim}:\text{PF}_6:\text{C}_8\text{mim}]^+$ | 1.09 (0.08)                        | 1, 8, 10, 11, 16, 18, 29, 32, 36, 37, 41, 44, 49, 53, 58, 60, 66, 77, 83, 94, 97, 103, 108, 109, 115, 127, 140, 147, 150, 155, 176, 200, 217, 239, 244(2), 245, 281, 283, 287, 295, 296, 299, 312, 376, 413, 418, 438(2), 441, 446, 448, 451, 494, 523, 524, 527, 533, 540, 628, 630, 637, 638, 671, 672, 685, 733, 735, 738, 740, 741, 748(2), 752, 759, 802, 803, 809, 828, 832, 866, 867, 873, 898(2), 900, 905, 909, 956, 994, 1003, 1006, 1007, 1032, 1037(2), 1038, 1040, 1044, 1047, 1051, 1061, 1064, 1066, 1072, 1107(2), 1122(2), 1136, 1139, 1155(2), 1156, 1160, 1176, 1177, 1213, 1220, 1246, 1253, 1263, 1273, 1289, 1296, 1302, 1308, 1322, 1327(2), 1329, 1335, 1338, 1339, 1341, 1343, 1350, 1351, 1378, 1381, 1396, 1398, 1402(2), 1404, 1415, 1417(2), 1419, 1445, 1448, 1463, 1464, 1486, 1487, 1488, 1489, 1491, 1492, 1494, 1497(2), 1498, 1501(2), 1502, 1505, 1510, 1511(2), 1512, 1517, 1518, 1596(2), 1604(2), 2994, 2997, 2999, 3001, 3004, 3006, 3011(2), 3012, 3018, 3019, 3020, 3021, 3023, 3024, 3032(2), 3043, 3048, 3055, 3063, 3065(3), 3073, 3079, 3080, 3084, 3088, 3093, 3127, 3128, 3142(2), 3168, 3170, 3276(2), 3284, 3288, 3295(2) |
| $[\text{C}_2\text{mim}]^+$                                  | 0.19 (0.02)                        | 46, 69, 135, 209, 233, 292, 378, 425, 592, 633, 660, 698, 753, 803, 834, 881, 962, 1036, 1043, 1099, 1102, 1124, 1136, 1150, 1175, 1270, 1311, 1343, 1385, 1411, 1428, 1437, 1461, 1484, 1491, 1494, 1509, 1510, 1595, 1604, 3046, 3070, 3079, 3110, 3122, 3134, 3150, 3165, 3274, 3278, 3292                                                                                                                                                                                                                                                                                                                                                                                                                                                                                                                                                                                                                                                                                                                                                                                                                                                                               |
| $[\text{C}_4\text{mim}]^+$                                  | 0.27 (0.02)                        | 28, 65, 69, 83, 112, 199, 237, 247, 273, 318, 407, 434, 626, 632, 664, 733, 741, 752, 801, 834, 879, 916, 946, 1010, 1037, 1042, 1054, 1100, 1125, 1128, 1147, 1150, 1175, 1234, 1295, 1299, 1318, 1336, 1345, 1381, 1395, 1412, 1424, 1436, 1460, 1484, 1489, 1492, 1502(2), 1510, 1515, 1594, 1603, 3015, 3025, 3032, 3041, 3065, 3069, 3072, 3094, 3108, 3121, 3149, 3165, 3274, 3279, 3292                                                                                                                                                                                                                                                                                                                                                                                                                                                                                                                                                                                                                                                                                                                                                                              |



**Table S7.** Vibrational Frequencies and Average Vibrational Energies of the  $[C_{n-2}\text{mim:PF}_6:C_n\text{mim}]^+$  Clusters,  $[C_n\text{mim}]^+$  Cations, and  $(C_n\text{mim:PF}_6)$  Ion Pairs<sup>a</sup>

| system                 | $E_{\text{int}}$ , eV <sup>b</sup> | vibrational frequencies (cm <sup>-1</sup> )                                                                                                                                                                                                                                                                                                                                                                                                                                                                                                                                                                                                                                                                     |
|------------------------|------------------------------------|-----------------------------------------------------------------------------------------------------------------------------------------------------------------------------------------------------------------------------------------------------------------------------------------------------------------------------------------------------------------------------------------------------------------------------------------------------------------------------------------------------------------------------------------------------------------------------------------------------------------------------------------------------------------------------------------------------------------|
| $[C_6\text{mim}]^+$    | 0.34 (0.03)                        | 28, 49, 52, 63, 76, 124, 131, 147, 214, 238, 245, 278, 294, 408, 437, 449, 626, 631, 666, 736, 737, 750, 754, 802, 833, 881, 897, 901, 1001, 1007, 1035, 1037, 1041, 1046, 1062, 1099, 1125, 1135, 1149, 1154, 1174, 1219, 1262, 1272, 1303, 1320, 1326, 1336, 1340, 1344, 1378, 1394, 1401, 1412, 1420, 1436, 1460, 1484, 1488, 1489, 1493, 1500, 1502, 1510(2), 1510, 1517, 1595, 1603, 3001, 3006, 3015, 3022, 3024, 3026, 3035, 3051, 3067, 3068, 3072, 3086, 3098, 3122, 3148, 3164, 3274, 3277, 3291                                                                                                                                                                                                      |
| $[C_8\text{mim}]^+$    | 0.42 (0.03)                        | 20, 38, 40, 53, 70, 93, 96, 107, 149, 156, 175, 193, 242(2), 279, 311, 374, 416, 448, 492, 626, 631, 666, 734, 736, 738, 752, 757, 801, 833, 872, 880, 900, 955, 994, 1004, 1032, 1036, 1038, 1044, 1059, 1064, 1072, 1100, 1125, 1138, 1148, 1155, 1172, 1211, 1245, 1251, 1286, 1294, 1306, 1322, 1329, 1338, 1340, 1342, 1345, 1378, 1392, 1402, 1403, 1412, 1419, 1435, 1461, 1484, 1486, 1487, 1491, 1492, 1497, 1501, 1505, 1511, 1512, 1517, 1594, 1603, 2996, 2999, 3004, 3009, 3014(2), 3022(2), 3025, 3032, 3044, 3055, 3068(2), 3071, 3083, 3091, 3120, 3148, 3164, 3275, 3277, 3292                                                                                                                 |
| $(C_2\text{mim:PF}_6)$ | 0.42 (0.03)                        | 3, 32, 36, 57, 69, 81, 99, 117, 166, 214, 238, 285, 293, 297, 303, 386, 426, 438, 442, 444, 511, 522, 526, 528(2), 596, 635, 669, 671, 705, 737, 806, 828, 832, 846, 857, 928, 965, 1039, 1047, 1104, 1109, 1120, 1138, 1157, 1179, 1272, 1313, 1352, 1393, 1413, 1424, 1455, 1464, 1493, 1497, 1501, 1510, 1514, 1596, 1605, 3037, 3060, 3079, 3102, 3113, 3139(2), 3165, 3277, 3279, 3295                                                                                                                                                                                                                                                                                                                     |
| $(C_4\text{mim:PF}_6)$ | 0.49 (0.04)                        | 11, 16, 34, 53, 60, 64, 76, 87, 112, 118, 139, 213, 241, 251, 284, 288, 293, 297, 318, 418, 431, 438, 441, 445, 513, 521, 527(2), 528, 628, 639, 670, 672, 735, 742, 747, 803, 828, 832, 844, 854, 912, 926, 949, 1015, 1039, 1046, 1062, 1109, 1120, 1131, 1153, 1158, 1178, 1238, 1294, 1301, 1320, 1336, 1355, 1389, 1402, 1415, 1421, 1455, 1465, 1491, 1494, 1501, 1503, 1506, 1511, 1517, 1596, 1604, 3010, 3017, 3024, 3039, 3058, 3060, 3074, 3086, 3095, 3130, 3139, 3166, 3277, 3280, 3295                                                                                                                                                                                                            |
| $(C_6\text{mim:PF}_6)$ | 0.57 (0.04)                        | 18, 19, 33, 40, 48, 56, 67, 74, 91, 99, 119, 129, 146, 150, 226, 244, 246, 284, 286, 293, 296, 299, 410, 438, 439, 441, 443, 457, 514, 521, 527(2), 528, 629, 642, 671, 674, 735, 738, 741, 752, 802, 824, 832, 843, 858, 897, 900, 924, 1003, 1008, 1036, 1039, 1044, 1051, 1065, 1108, 1121, 1136, 1156, 1161, 1177, 1222, 1264, 1274, 1303, 1324, 1327, 1337, 1342, 1352, 1377, 1398, 1404, 1415, 1416, 1450, 1463, 1487, 1489, 1494, 1499, 1500, 1501, 1509, 1510, 1515, 1596, 1604, 2994, 2997, 3005, 3014, 3019, 3028, 3037, 3055, 3060, 3060, 3081, 3086, 3093, 3132, 3138, 3165, 3277, 3282, 3296                                                                                                       |
| $(C_8\text{mim:PF}_6)$ | 0.64 (0.05)                        | 12, 14, 30, 33, 40, 47, 59, 63, 75, 91, 98, 106, 113, 128, 148, 155, 179, 212, 245, 247, 285, 287, 293, 295, 315, 379, 420, 438, 441, 443, 450, 496, 515, 521, 526, 527, 528, 629, 641, 671, 673, 732, 737, 738, 741, 758, 803, 824, 832, 844, 858, 874, 898, 917, 958, 995, 1006, 1034, 1038, 1041, 1048, 1062, 1066, 1073, 1108, 1121, 1139, 1156, 1163, 1175, 1214, 1247, 1254, 1288, 1297, 1307, 1328, 1332, 1339, 1343, 1345, 1354, 1378, 1397, 1403, 1407, 1415, 1417, 1450, 1463, 1485, 1486, 1490, 1493, 1497, 1500, 1501, 1504, 1509, 1511, 1516, 1595, 1604, 2992, 2994, 2996, 3001, 3006, 3014, 3015, 3018, 3025, 3035, 3045, 3058, 3059, 3060, 3079, 3083, 3095, 3132, 3138, 3165, 3278, 3281, 3296 |

<sup>a</sup>Determined at the B3LYP/6-311+G(d,p) level of theory and with frequencies scaled by 0.9887. Degeneracies are listed in parentheses. <sup>b</sup>Uncertainties are listed in parentheses.

**Table S8.** Rotational Constants (in  $\text{cm}^{-1}$ ) of  $[\text{C}_{n-2}\text{mim}:\text{PF}_6:\text{C}_n\text{mim}]^+$  Clusters and the Corresponding PSL Transition States

| system                                                      | ionic product              | energized molecule |                  | transition state |                  |                  |
|-------------------------------------------------------------|----------------------------|--------------------|------------------|------------------|------------------|------------------|
|                                                             |                            | 1-D <sup>a</sup>   | 2-D <sup>b</sup> | 1-D <sup>c</sup> | 2-D <sup>c</sup> | 2-D <sup>d</sup> |
| $[\text{C}_2\text{mim}:\text{PF}_6:\text{C}_4\text{mim}]^+$ | $[\text{C}_2\text{mim}]^+$ | 0.01040            | 0.00288          | 0.178, 0.0165    | 0.0393, 0.0075   | 0.0009           |
|                                                             | $[\text{C}_4\text{mim}]^+$ | 0.01040            | 0.00288          | 0.132, 0.0273    | 0.0167, 0.0106   | 0.0009           |
| $[\text{C}_4\text{mim}:\text{PF}_6:\text{C}_6\text{mim}]^+$ | $[\text{C}_4\text{mim}]^+$ | 0.00503            | 0.00188          | 0.132, 0.0121    | 0.0167, 0.00604  | 0.0007           |
|                                                             | $[\text{C}_6\text{mim}]^+$ | 0.00503            | 0.00188          | 0.110, 0.0165    | 0.00831, 0.00748 | 0.0007           |
| $[\text{C}_6\text{mim}:\text{PF}_6:\text{C}_8\text{mim}]^+$ | $[\text{C}_6\text{mim}]^+$ | 0.00323            | 0.00144          | 0.110, 0.0118    | 0.00831, 0.00361 | 0.0005           |
|                                                             | $[\text{C}_8\text{mim}]^+$ | 0.00323            | 0.00144          | 0.096, 0.0121    | 0.00470, 0.00604 | 0.0005           |

<sup>a</sup>Active external. <sup>b</sup>Inactive external. <sup>c</sup>Rotational constants of the transition state treated as free internal rotors.

<sup>d</sup>Two-dimensional rotational constants of the transition state at threshold, treated variationally and statistically.

## FIGURE CAPTIONS

**Figure S1.** Nomenclature employed in this work to describe the stable conformations predicted for the  $[C_n\text{mim}]^+$  cations,  $(C_n\text{mim:PF}_6)$  ion pairs, and  $[2C_n\text{mim:PF}_6]^+$  and  $[C_{n-2}\text{mim:PF}_6:C_n\text{mim}]^+$  clusters.

**Figure S2.** B3LYP/6-311+G(d,p) optimized geometries of the ground conformers of the  $[C_n\text{mim}]^+$  cations and  $[\text{PF}_6]^-$  anion. Noncovalent interaction maps at an isosurface of 0.20 a.u. of the reduced electron density gradients determined using a 6-311+G(2d,2p) basis set have been superimposed on the optimized structures.

**Figure S3.** B3LYP/6-311+G(d,p) optimized geometries of the ground conformers of the  $(C_n\text{mim:PF}_6)$  ion pairs. Noncovalent interaction maps at an isosurface of 0.20 a.u. of the reduced electron density gradients determined using a 6-311+G(2d,2p) basis set have been superimposed on the optimized structures.

**Figure S4.** B3LYP/6-311+G(d,p) and M06-2X/6-311+G(d,p) optimized geometries of the ground conformers of the  $[C_{n-2}\text{mim:PF}_6:C_n\text{mim}]^+$  clusters. Noncovalent interaction maps at an isosurface of 0.20 a.u. of the reduced electron density gradients determined using the 6-311+G(2d,2p) basis set have been superimposed on the optimized structures.

**Figure S5.** B3LYP/6-311+G(d,p) optimized geometries of the ground and select stable conformers of the  $[\text{C}_2\text{mim:PF}_6:\text{C}_4\text{mim}]^+$  cluster. Conformer designations along with the B3LYP/6-311+G(2d,2p), B3LYP-GD3BJ/6-311+G(2d,2p) and M06-2X/6-311+G(2d,2p) relative Gibbs energies at 298 K (in kJ/mol) are also listed. The  $[\text{g};\text{g};\text{g};\text{Fg};\text{F};\text{g};\text{t}_2]^+$  structure is optimized at the M06-2X/6-311+G(d,p) level of theory. Conformers not determined upon M06-2X or B3LYP-GD3BJ re-optimization of the B3LYP optimized structures (due to significant structural rearrangement) are indicated with a dash.

**Figure S6.** B3LYP/6-311+G(d,p) optimized geometries of the ground and select stable conformers of the  $[\text{C}_4\text{mim:PF}_6:\text{C}_6\text{mim}]^+$  cluster. Conformer designations along with the B3LYP/6-311+G(2d,2p), B3LYP-GD3BJ/6-311+G(2d,2p) and M06-2X/6-311+G(2d,2p) relative Gibbs energies at 298 K (in kJ/mol) are also listed. The  $[\text{g};\text{t}_2;\text{g};\text{g};\text{Fg};\text{F};\text{g};\text{t}_4]^+$  and  $[\text{g};\text{t}_2;\text{g};\text{g};\text{Fg};\text{F};\text{g};\text{t}_4]^+$  conformers are optimized using B3LYP-GD3BJ and M06-2X respectively. Conformers not determined upon M06-2X or B3LYP-GD3BJ re-optimization of the B3LYP optimized structures (due to significant structural rearrangement) are indicated with a dash.

**Figure S7.** B3LYP/6-311+G(d,p) optimized geometries of the ground and select stable conformers of the  $[\text{C}_6\text{mim:PF}_6:\text{C}_8\text{mim}]^+$  cluster. Conformer designations along with the B3LYP/6-311+G(2d,2p), B3LYP-GD3BJ/6-311+G(2d,2p) and M06-2X/6-311+G(2d,2p) relative Gibbs energies at 298 K (in kJ/mol) are also listed. The  $[\text{g};\text{t}_4;\text{g};\text{g};\text{Fg};\text{F};\text{g};\text{t}_6]^+$  and  $[\text{g};\text{t}_4;\text{g};\text{g};\text{Fg};\text{F};\text{g};\text{t}_6]^+$  conformers are optimized using B3LYP-GD3BJ and M06-2X respectively. Conformers not determined upon M06-2X or B3LYP-GD3BJ re-optimization of the B3LYP optimized structures (due to significant structural rearrangement) are indicated with a dash.

**Figure S8.** Electrostatic potential maps of the B3LYP/6-311+G(d,p) and M06-2X/6-311+G(d,p) ground conformers of the  $[C_{n-2}\text{mim:PF}_6:C_n\text{mim}]^+$  clusters. The ESP maps are shown at an isosurface of 0.01 a.u. of the total B3LYP/6-311+G(2d,2p) SCF electron density. The Mülliken charges on the hydrogen atoms of the cations and fluorine atoms of the anion are labeled. The most electropositive regions are color-coded in blue and occur at the hydrogen atoms of the 3-methylimidazolium moiety, with the C2 hydrogen atom displaying the greatest Mülliken charge. The most electronegative regions are color-coded in red, and occur at the fluorine atoms of the anion. Regions of intermediate ESP are shown in green and yellow and become more prevalent as the size of the 1-alkyl substituent increases.

**Figure S9.** Comparison of the B3LYP, B3LYP-GD3BJ, and M06-2X computed 0 K BDEs versus measured threshold dissociation energies of the  $[C_{n-2}\text{mim:PF}_6:C_n\text{mim}]^+$  clusters for  $n = 4, 6, \text{ and } 8$  (in kJ/mol). All theoretical values include ZPE and BSSE corrections. The  $[C_n\text{mim}]^+$  and  $[C_{n-2}\text{mim}]^+$  primary product cations are indicated with closed and open symbols, respectively. The  $n-2:n$  values of each cluster are indicated. The diagonal lines indicate values for which the calculated and measured values are equal.

**Figure S10.** Comparison of the B3LYP, B3LYP-GD3BJ, and M06-2X computed relative BDEs of the  $[C_{n-2}\text{mim:PF}_6:C_n\text{mim}]^+$  clusters (for  $n = 4, 6 \text{ and } 8$ ) and relative IPEs of the  $(C_n\text{mim:PF}_6)$  ion pairs (for  $n = 2, 4, 6, \text{ and } 8$ ) vs. experimentally determined 0 K  $\Delta\text{BDEs}$  of the  $[C_{n-2}\text{mim:PF}_6:C_n\text{mim}]^+$  clusters (for  $n = 4, 6 \text{ and } 8$ ). All theoretical values include ZPE and BSSE corrections. The  $\Delta\text{IPEs}$  and  $\Delta\text{BDEs}$  are indicated with open and closed symbols, respectively. The  $n-2:n$  values of each cluster are indicated. The diagonal lines indicate values for which the calculated and measured values are equal.

**Figure S11.** Comparison of the B3LYP, B3LYP-GD3BJ, and M06-2X computed vs. TCID measured 0 K BDEs of the  $[2C_n\text{mim:PF}_6]^+$  clusters for  $n = 2, 4, 6, \text{ and } 8$  (in kJ/mol). All theoretical values include ZPE and BSSE corrections. Values derived from direct TCID measurements (taken from reference 1) and those determined from regression analyses using the direct and competitive TCID measurements are indicated with open and closed symbols, respectively. The diagonal lines indicate values for which the calculated and measured values are equal.

## REFERENCES

1. H. A. Roy and M. T. Rodgers, *Phys. Chem. Chem. Phys.*, 2021, **23**, 13405-13418.

Figure S1.

## $[C_n\text{mim}]^+$ Nomenclature

$$[a_1a_2\dots a_{n-1}]^+$$

$$[C_2\text{mim}]^+ = [a_1]^+$$

$$[C_4\text{mim}]^+ = [a_1a_2a_3]^+$$

$$[C_6\text{mim}]^+ = [a_1a_2a_3a_4a_5]^+$$

$$[C_8\text{mim}]^+ = [a_1a_2a_3a_4a_5a_6a_7]^+$$
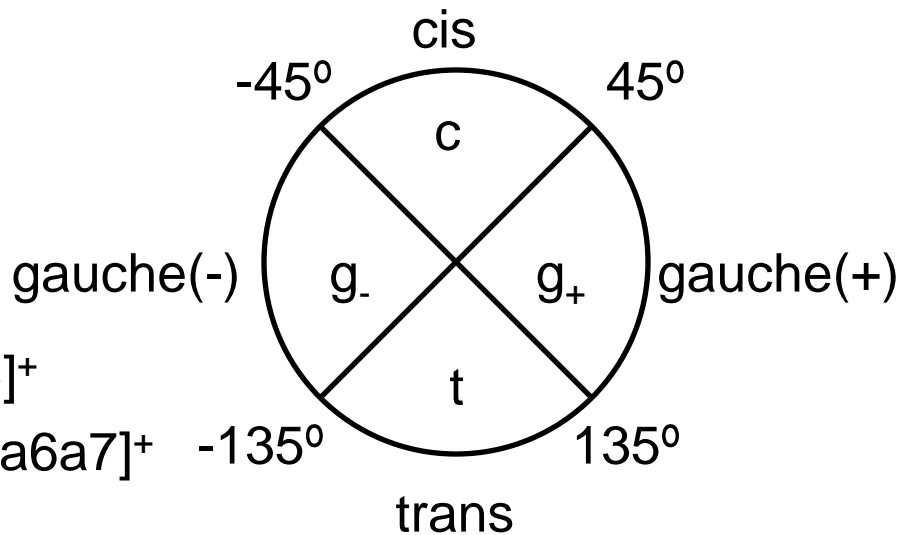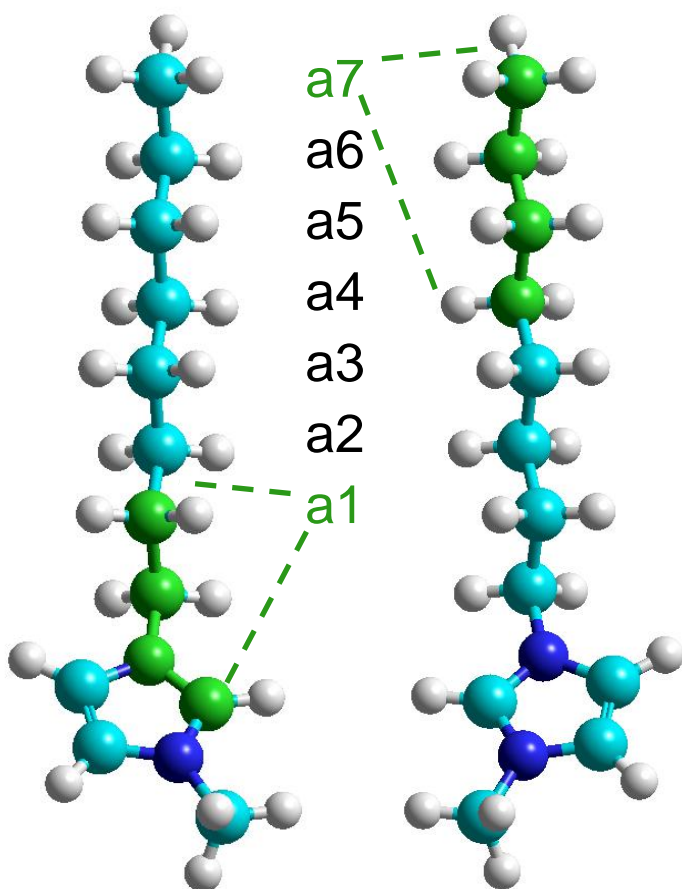

$$[g\_ttttt]^+$$

$$[g\_t_6]^+$$

$$[g\_+ttttt]^+$$

$$[g\_+t_6]^+$$

$$[C_8\text{mim}]^+$$

## Dihedral Angle Classification

### 1-Alkyl Dihedral Angles

$$a_1 = \angle C_2N_1C_1'C_2'$$

$$a_2 = \angle N_1C_1'C_2'C_3'$$

$$a_3 = \angle C_1'C_2'C_3'C_4'$$

$$a_4 = \angle C_2'C_3'C_4'C_5'$$

$$a_5 = \angle C_3'C_4'C_5'C_6'$$

$$a_6 = \angle C_4'C_5'C_6'C_7'$$

$$a_7 = \angle C_5'C_6'C_7'C_8'$$

Figure S1.

## Binding Site (BS) Nomenclature

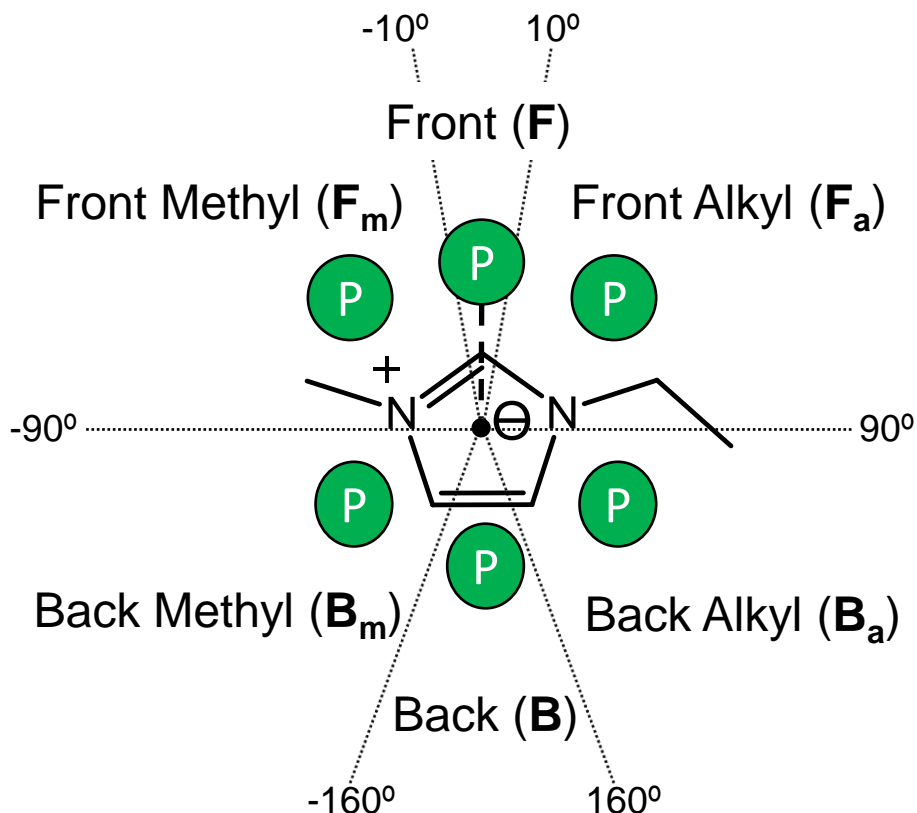

The **binding site (BS)** designation is readily described by the dihedral angle  $\mathbf{b} = \angle(\text{C2}, \text{©}, \text{©} + \text{CP}, \text{P})$ , where © denotes the centroid of the imidazolium ring (N1C2N3C4C5) and CP denotes the cross product of the vectors that describe the C2-N1 and C2-N3 bonds, i.e.,  $\text{CP} = \overrightarrow{(\text{C2}-\text{N1})} \times \overrightarrow{(\text{C2}-\text{N3})}$ . The range of angles that define BS designations are shown in the figure above and the bar below.

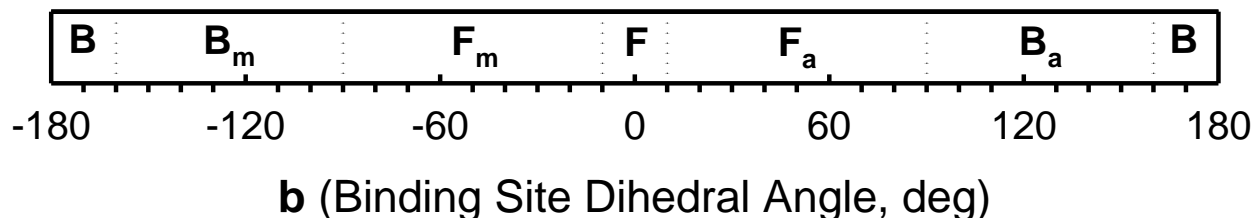

Figure S1.

## Binding Site (BS) Nomenclature

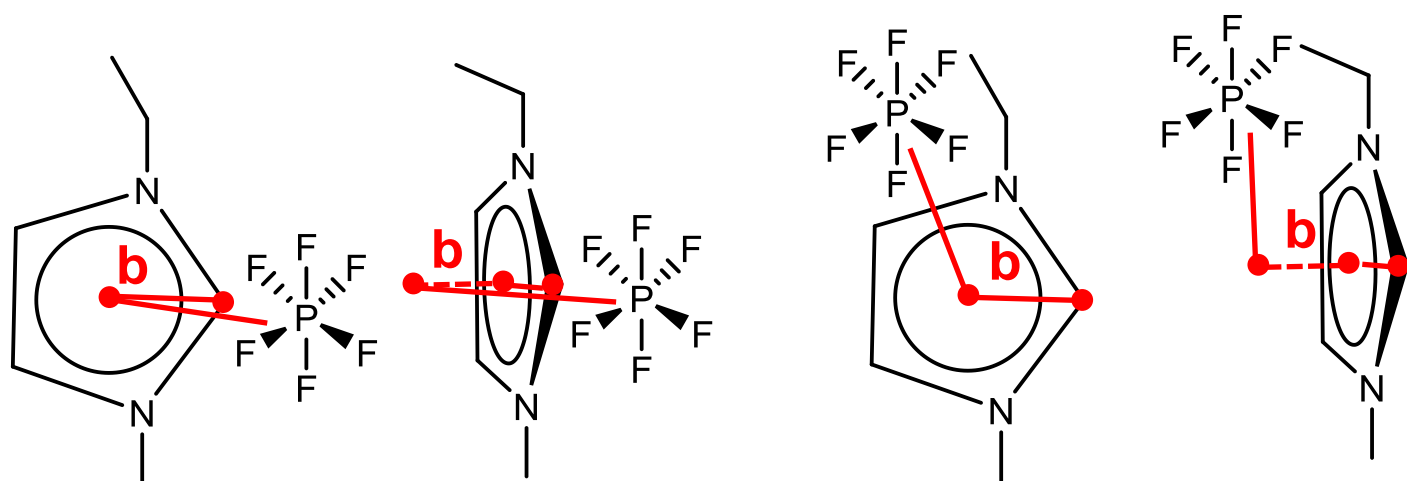Front Binding (**F**)Back Alkyl Binding (**B<sub>a</sub>**)

The **binding site (BS)** designation is readily described by the dihedral angle  $\mathbf{b} = \angle(\text{C2}, \text{©}, \text{©} + \text{CP}, \text{P})$ , where © denotes the centroid of the imidazolium ring (N1C2N3C4C5) and CP denotes the cross product of the vectors that describe the C2-N1 and C2-N3 bonds, i.e.,  $\text{CP} = \overrightarrow{(\text{C2}-\text{N1})} \times \overrightarrow{(\text{C2}-\text{N3})}$ . The range of angles that define BS designations are shown in the figure above and the bar below.

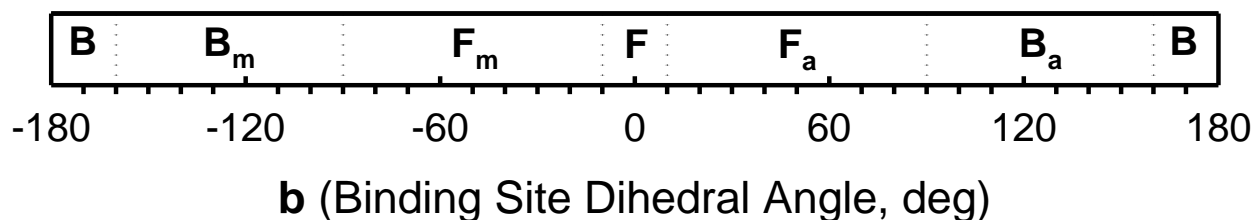

Figure S1.

 $(C_n\text{mim:PF}_6)$  Nomenclature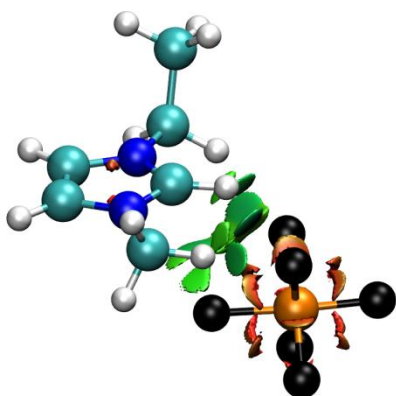**(Binding Site;Alkyl)** $(b1BS;a1\dots an)$  $b1 = \angle C1''N3C2P$  $(C_2\text{mim:PF}_6)$   
 $(g_+F;g_-)$  $[C_{n-2}\text{mim:PF}_6:C_n\text{mim}]^+$  Nomenclature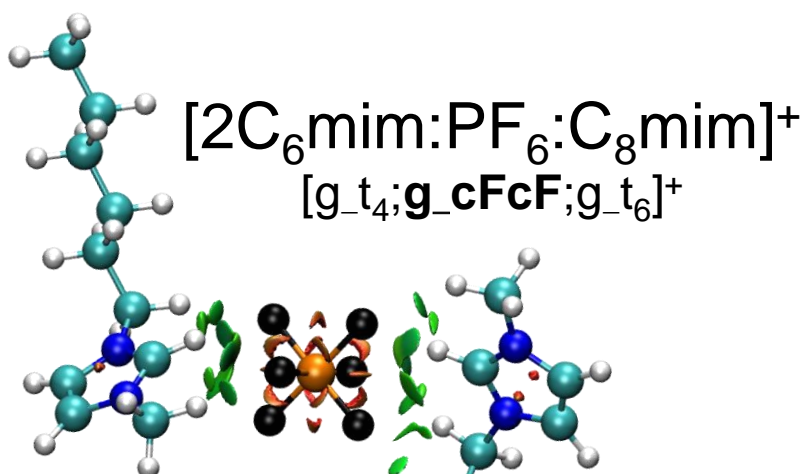 $[2C_6\text{mim:PF}_6:C_8\text{mim}]^+$   
 $[g_{-t_4};g_{-cF_cF};g_{-t_6}]^+$  $[\text{Alkyl}_{n-2};\text{Binding Sites};\text{Alkyl}_n]^+$  $[a1\dots an-2;b2b1BS(1)b1BS(2);a1\dots an]^+$  $b2 = \angle C1'N1(n-2)N1C1'(n)$ 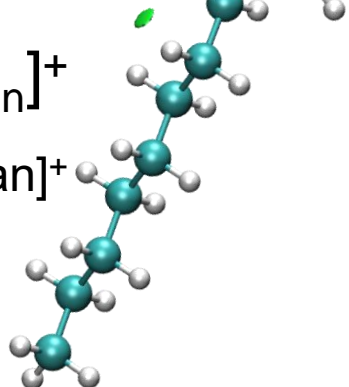



Figure S2.

B3LYP/6-311+G(d,p)

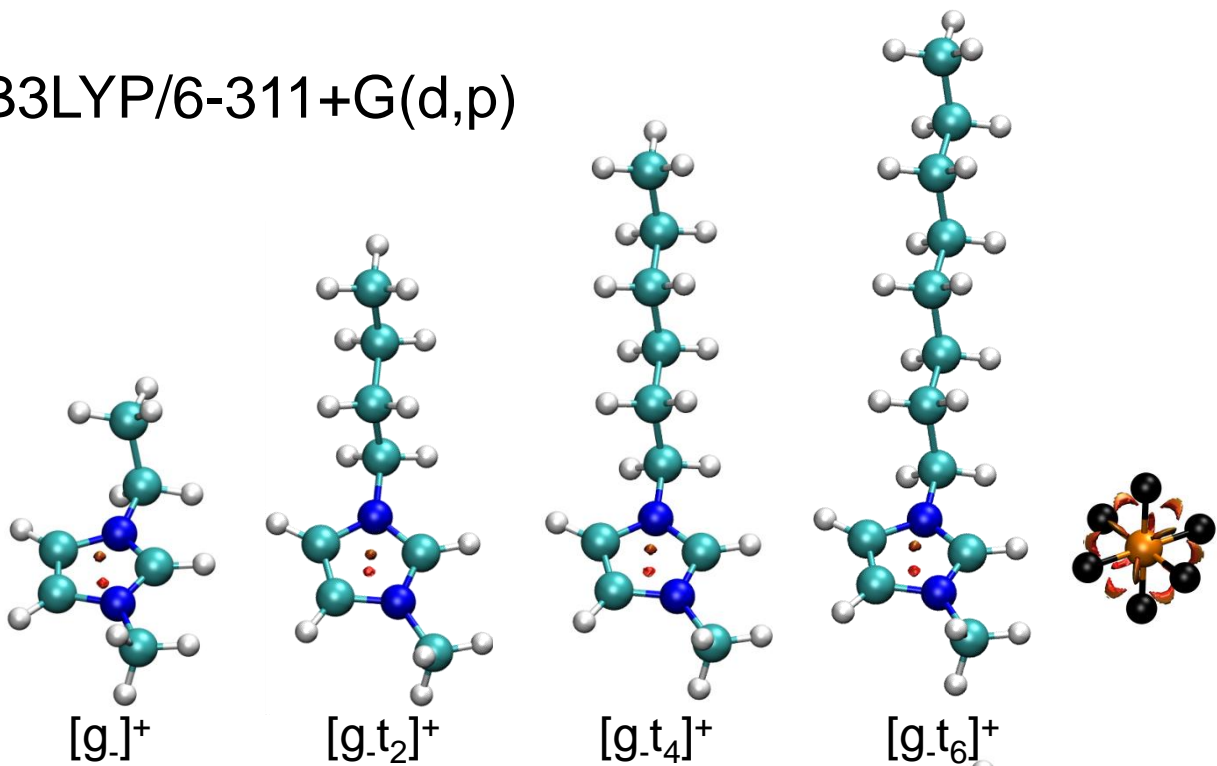

M06-2X/6-311+G(d,p)

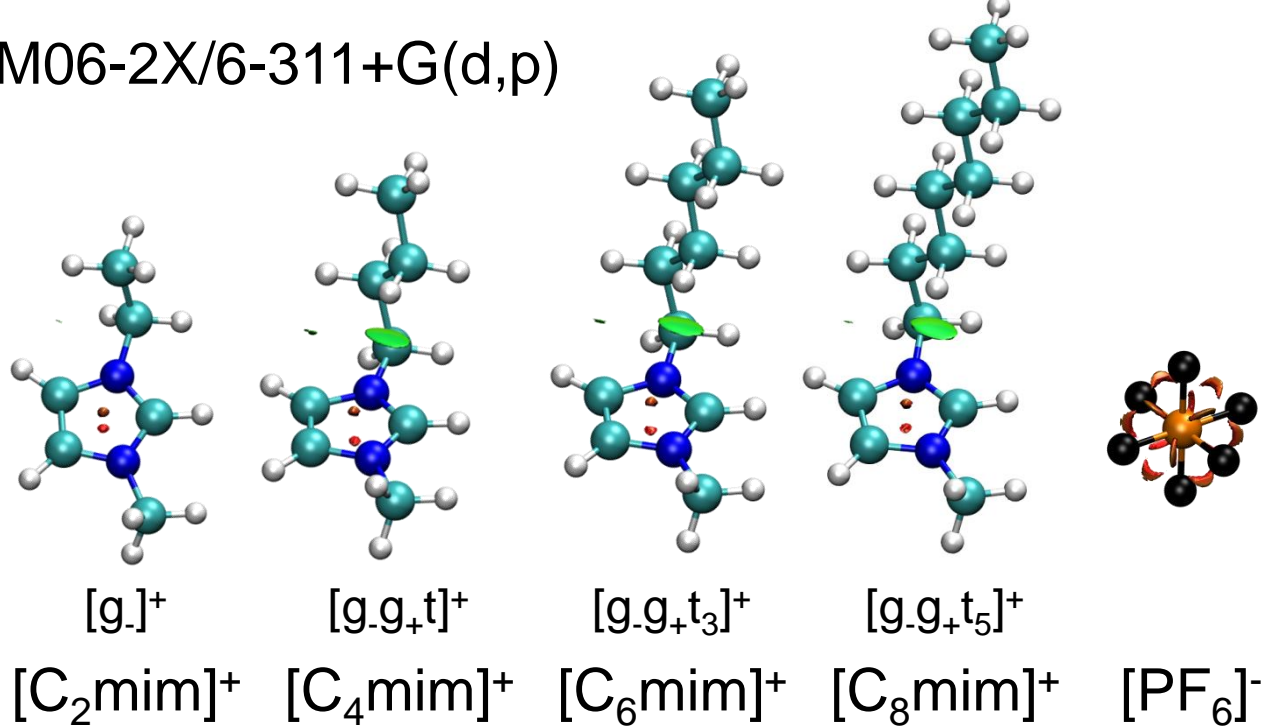

Figure S3.

B3LYP/6-311+G(d,p)

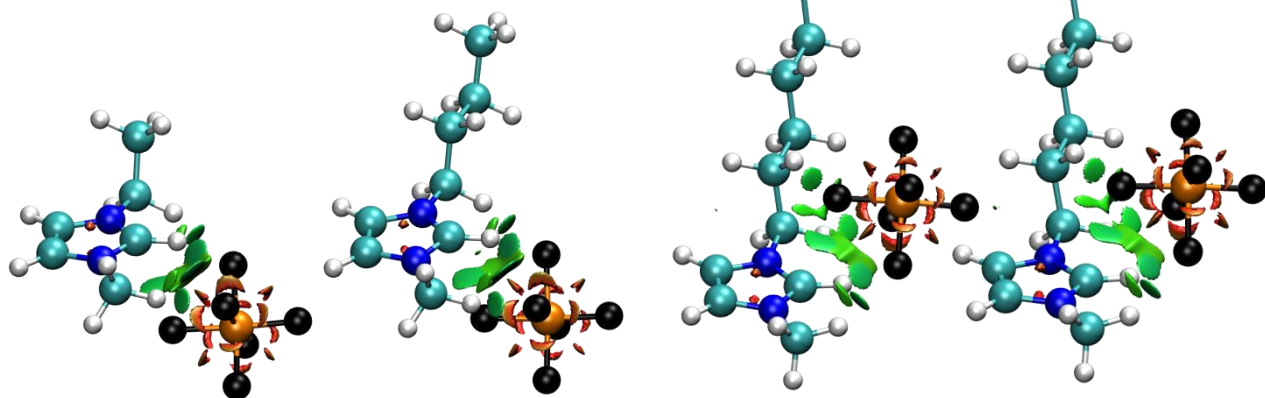 $(g_+F;g.)$  $(g_+F;g.t_2)$  $(g.F;g.t_4)$  $(g.F;g.t_6)$  $(C_2mim:PF_6)$  $(C_4mim:PF_6)$  $(C_6mim:PF_6)$  $(C_8mim:PF_6)$ 

M06-2X/6-311+G(d,p)

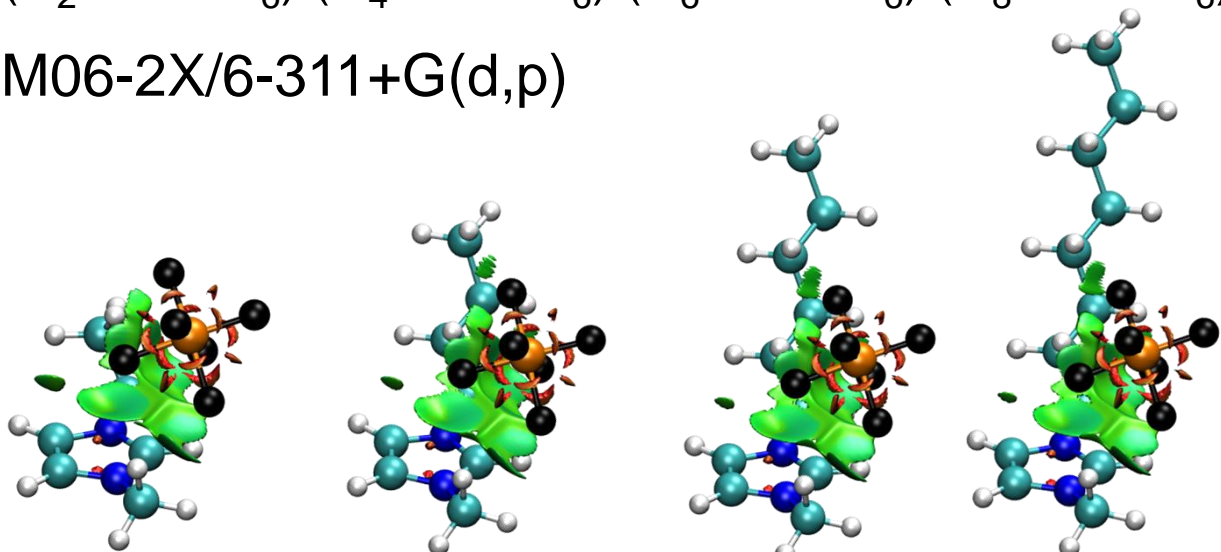 $(g.F;g.)$  $(g.F;g.t_2)$  $(g.F;g.t_4)$  $(g.F;g.t_6)$

## Figure S4.

B3LYP/6-311+G(d,p)

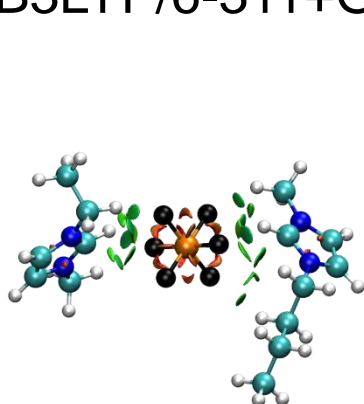[g.;g.cFcF;g.t<sub>2</sub>]<sup>+</sup>[C<sub>2</sub>mim:PF<sub>6</sub>:C<sub>4</sub>mim]<sup>+</sup>[g.;g.g<sub>+</sub>Fg<sub>+</sub>F;g.t<sub>2</sub>]<sup>+</sup>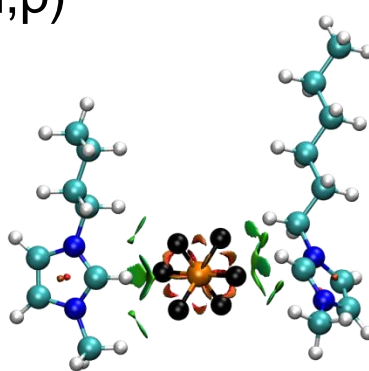[g.t<sub>2</sub>;g.cFcF;g.t<sub>4</sub>]<sup>+</sup>[C<sub>4</sub>mim:PF<sub>6</sub>:C<sub>6</sub>mim]<sup>+</sup>[g.t<sub>2</sub>;g.g<sub>+</sub>Fg<sub>+</sub>F;g.t<sub>4</sub>]<sup>+</sup>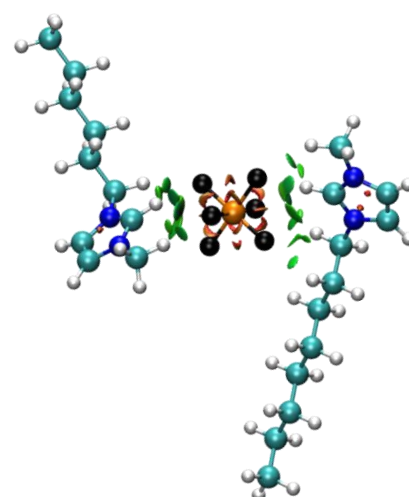[g.t<sub>4</sub>;g.cFcF;g.t<sub>6</sub>]<sup>+</sup>[C<sub>6</sub>mim:PF<sub>6</sub>:C<sub>8</sub>mim]<sup>+</sup>[g.t<sub>4</sub>;g.g<sub>+</sub>Fg<sub>+</sub>F;g.t<sub>6</sub>]<sup>+</sup>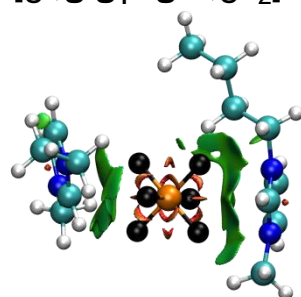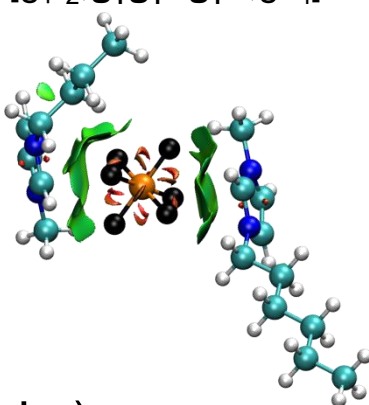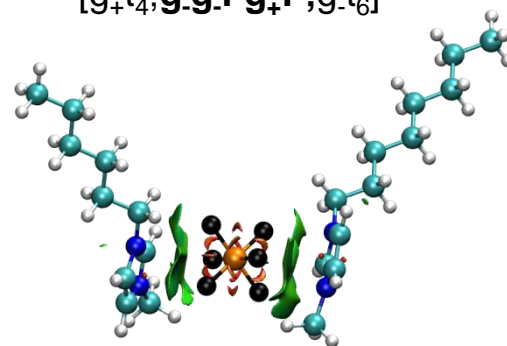

M06-2X/6-311+G(d,p)

## Figure S5.

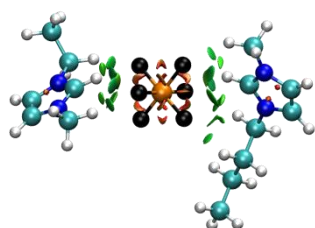

$[g_-;g_cFcF;g_t2]^+$   
0.0, -, - kJ/mol

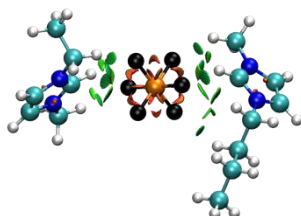

$[g_+;g_+cFcF;g_t2]^+$   
0.0, -, - kJ/mol

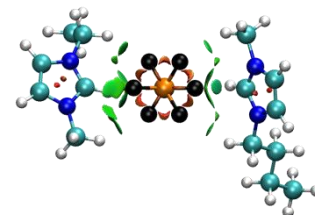

$[g_+;g_cFcF;g_t2]^+$   
0.3, -, - kJ/mol

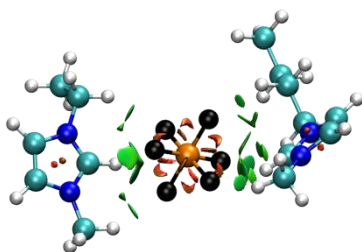

$[g_+;g_cFcF;g_t2]^+$   
1.2, -, - kJ/mol

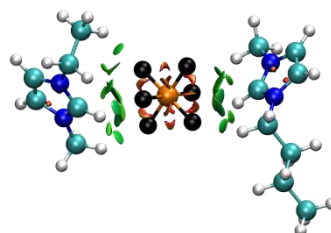

$[g_+;g_+cFcF;g_t2]^+$   
2.2, -, - kJ/mol

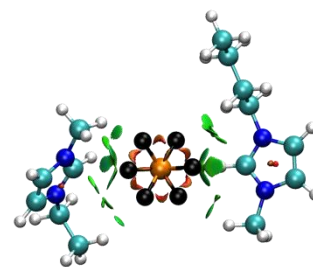

$[g_+;g_+cFcF;g_t2]^+2$   
2.5, -, - kJ/mol

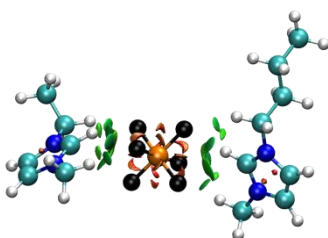

$[g_-;g_+cFcF;g_t2]^+$   
3.1, -, - kJ/mol

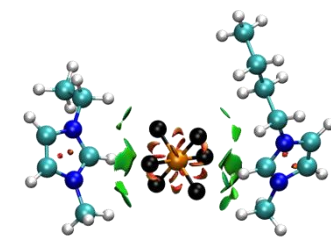

$[g_+;g_+cFcF;g_t2]^+$   
3.2, -, - kJ/mol

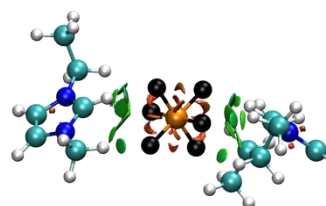

$[g_-;ccFcF;g_t2]^+$   
3.5, -, - kJ/mol

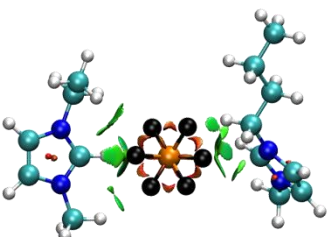

$[g_-;g_+cFcF;g_t2]^+$   
3.6, -, - kJ/mol

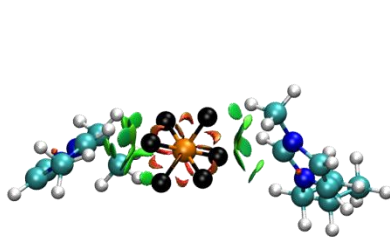

$[g_+;g_cFcF;g_t2]^+$   
3.6, -, - kJ/mol

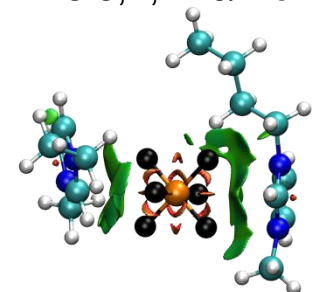

$[g_-;g_g_+Fg_F;g_t2]^+$   
-, 0.0, 0.0, kJ/mol

$[C_2mim:PF_6:C_4mim]^+$

Figure S6.

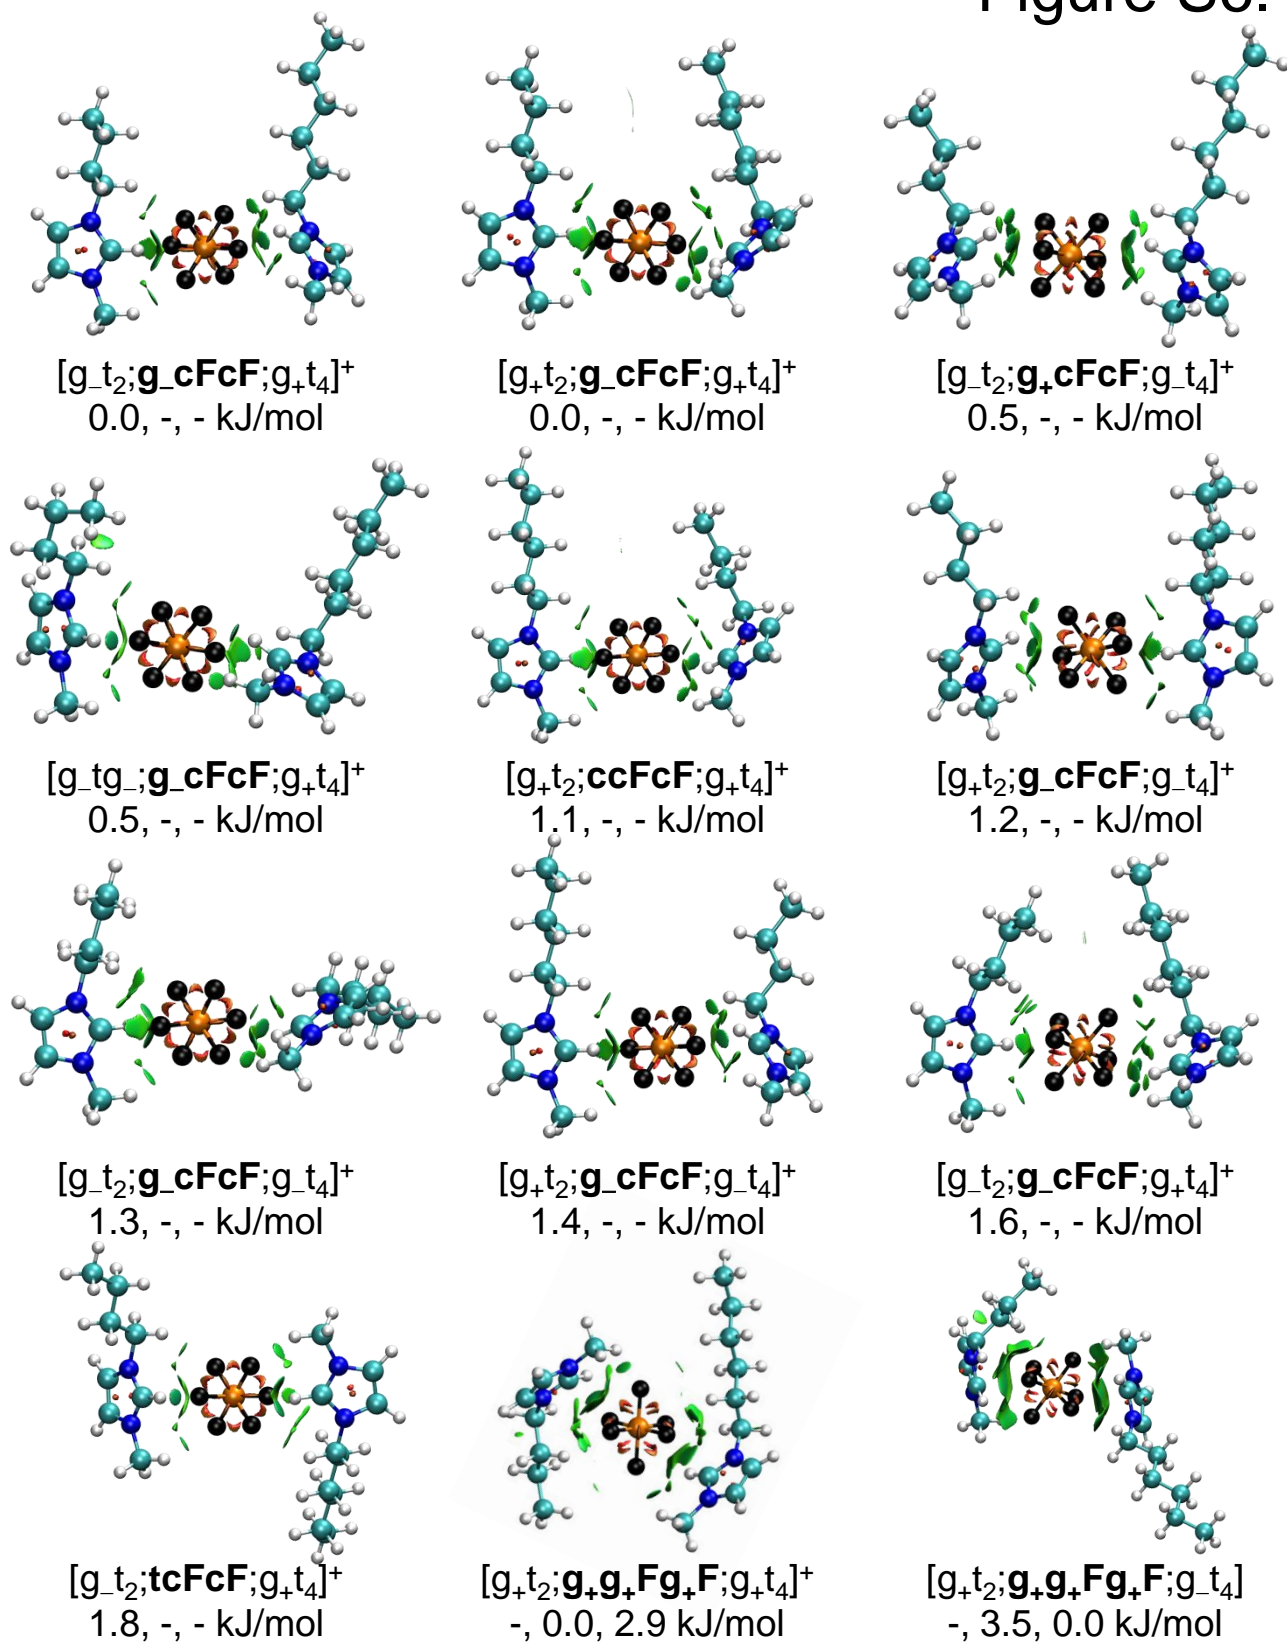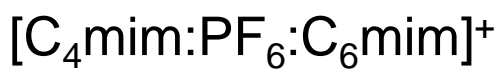



Figure S7.

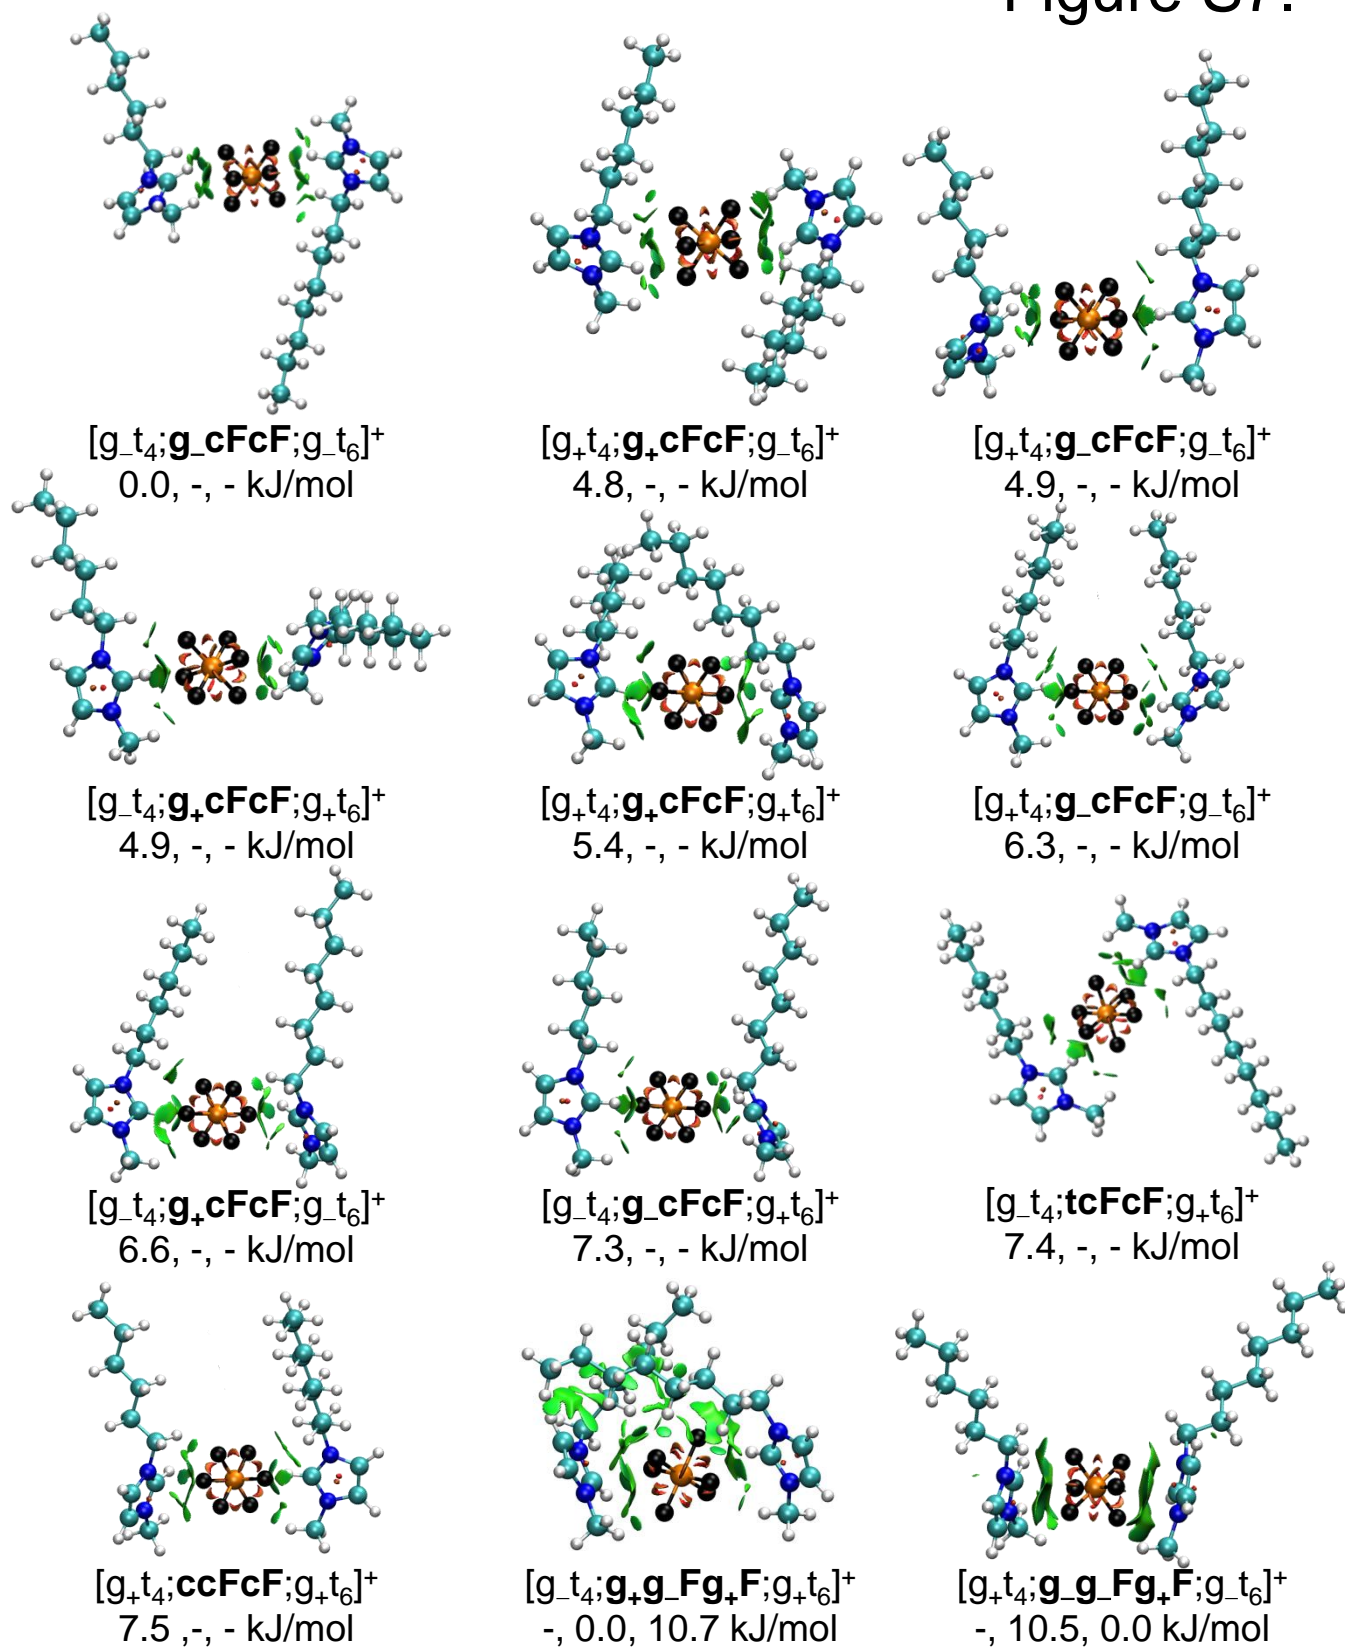

[C<sub>6</sub>mim:PF<sub>6</sub>:C<sub>8</sub>mim]<sup>+</sup>

Figure S8.

B3LYP/6-311+G(d,p)

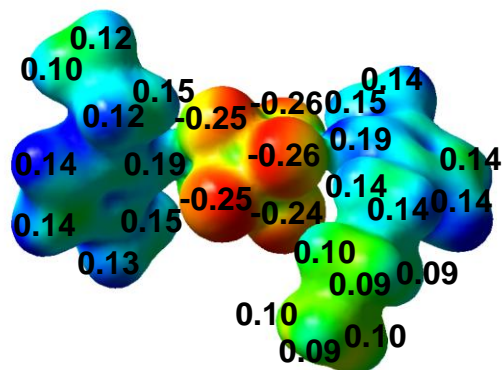[g<sub>-</sub>;g<sub>-</sub>cFcF;g<sub>-</sub>t<sub>2</sub>]<sup>+</sup>[C<sub>2</sub>mim:PF<sub>6</sub>:C<sub>4</sub>mim]<sup>+</sup>[g<sub>-</sub>;g<sub>-</sub>g<sub>+</sub>Fg<sub>-</sub>F;g<sub>-</sub>t<sub>2</sub>]<sup>+</sup>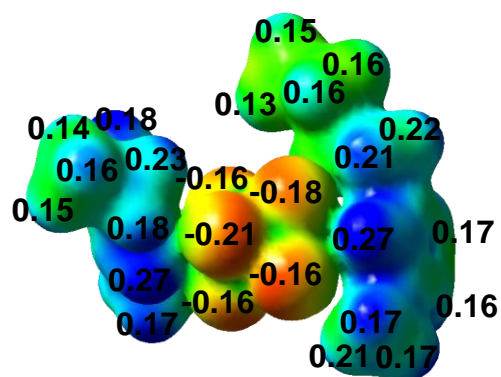

M06-2X/6-311+G(d,p)

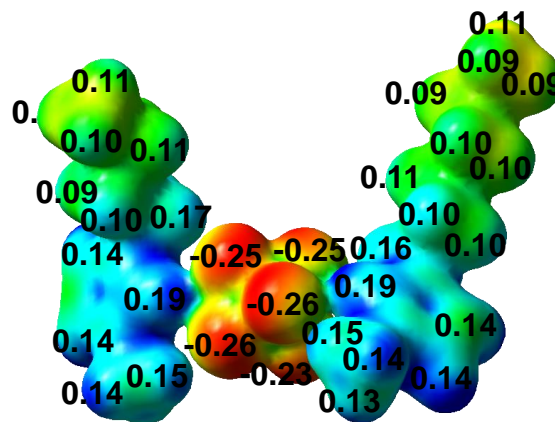[g<sub>-</sub>t<sub>2</sub>;g<sub>-</sub>cFcF;g<sub>+</sub>t<sub>4</sub>]<sup>+</sup>[C<sub>4</sub>mim:PF<sub>6</sub>:C<sub>6</sub>mim]<sup>+</sup>[g<sub>+</sub>t<sub>2</sub>;g<sub>+</sub>g<sub>+</sub>Fg<sub>+</sub>F;g<sub>-</sub>t<sub>4</sub>]<sup>+</sup>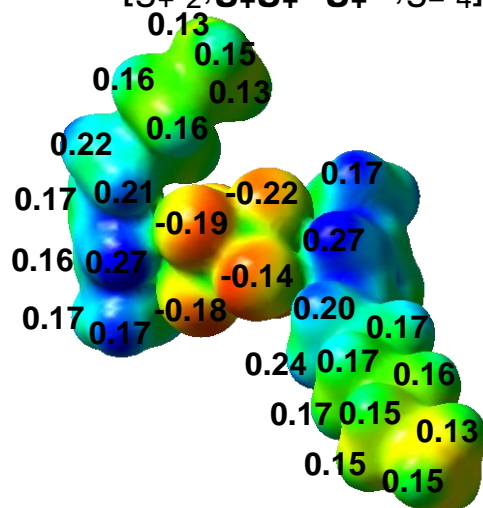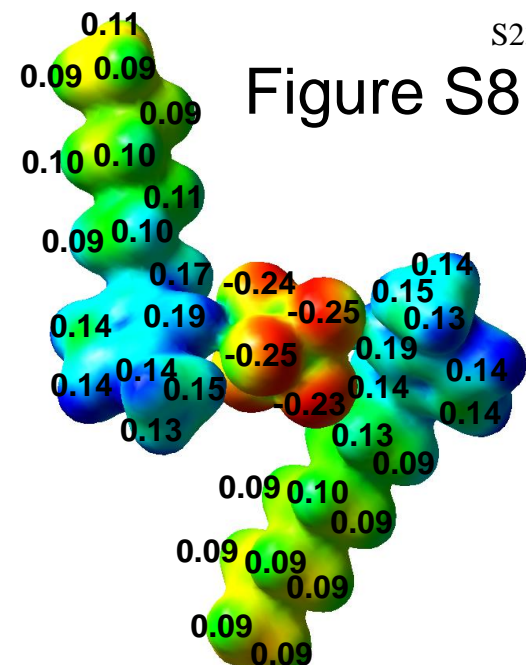[g<sub>-</sub>t<sub>4</sub>;g<sub>+</sub>cFcF;g<sub>-</sub>t<sub>6</sub>]<sup>+</sup>[C<sub>6</sub>mim:PF<sub>6</sub>:C<sub>8</sub>mim]<sup>+</sup>[g<sub>+</sub>t<sub>4</sub>;g<sub>-</sub>g<sub>-</sub>Fg<sub>+</sub>F;g<sub>-</sub>t<sub>6</sub>]<sup>+</sup>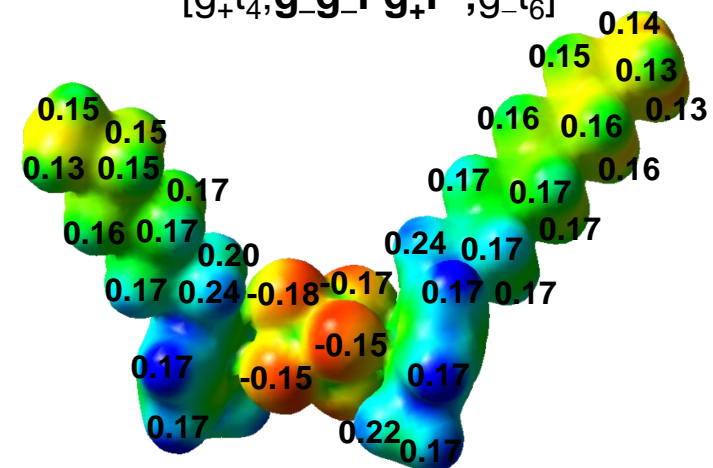

0.025

+0.20

Figure S9.

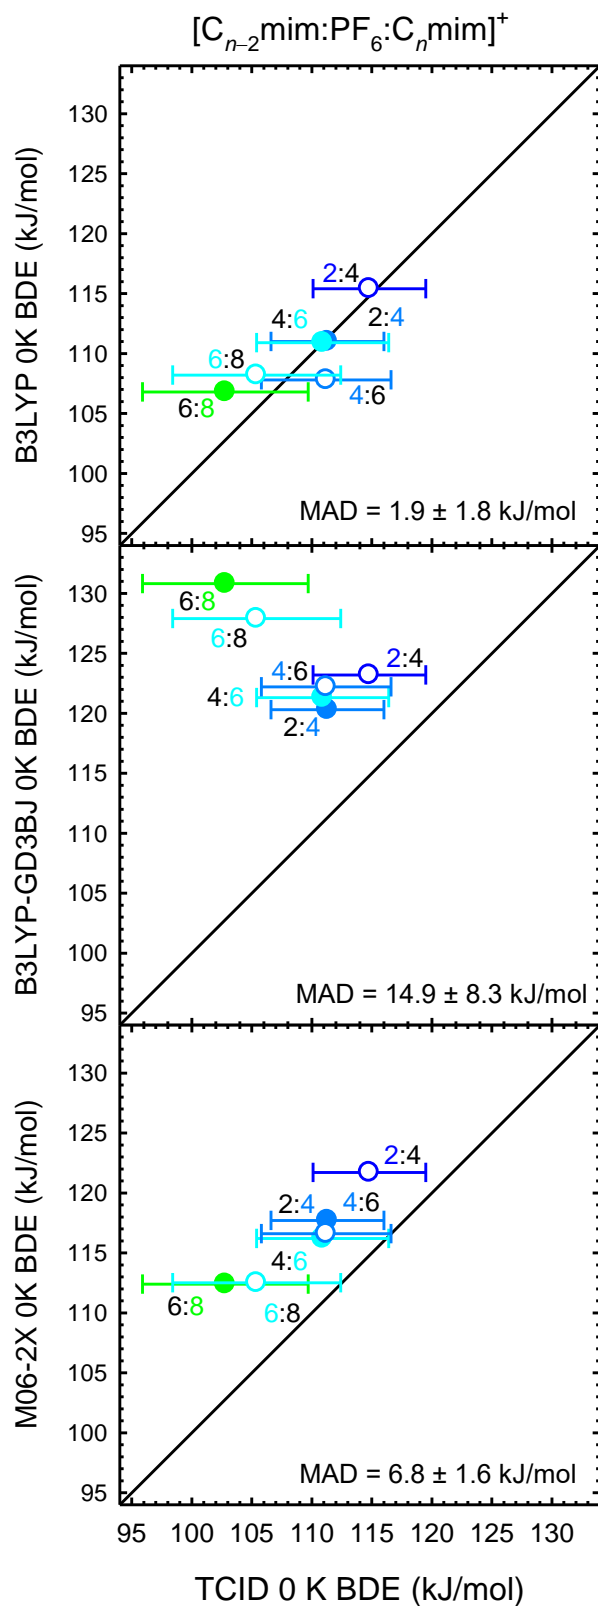



Figure S10.

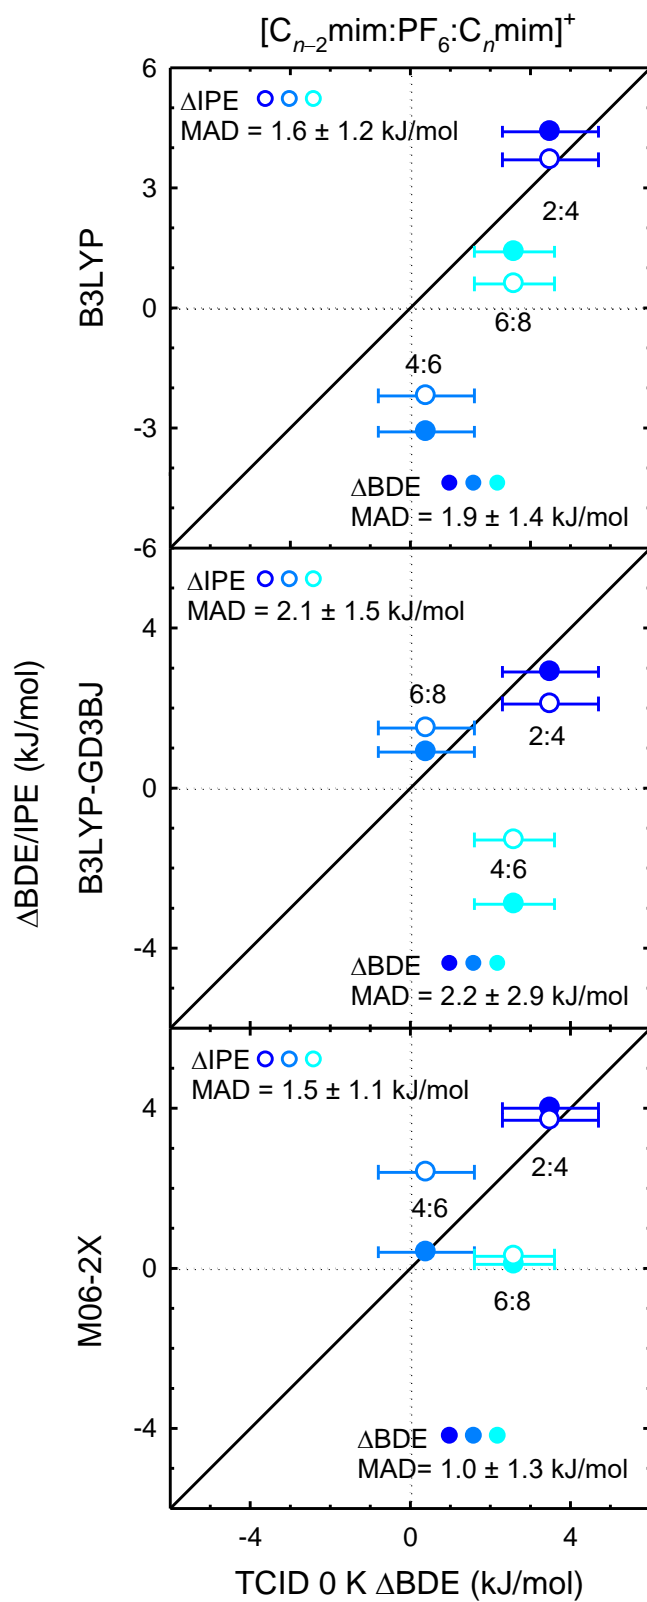

Figure S11.

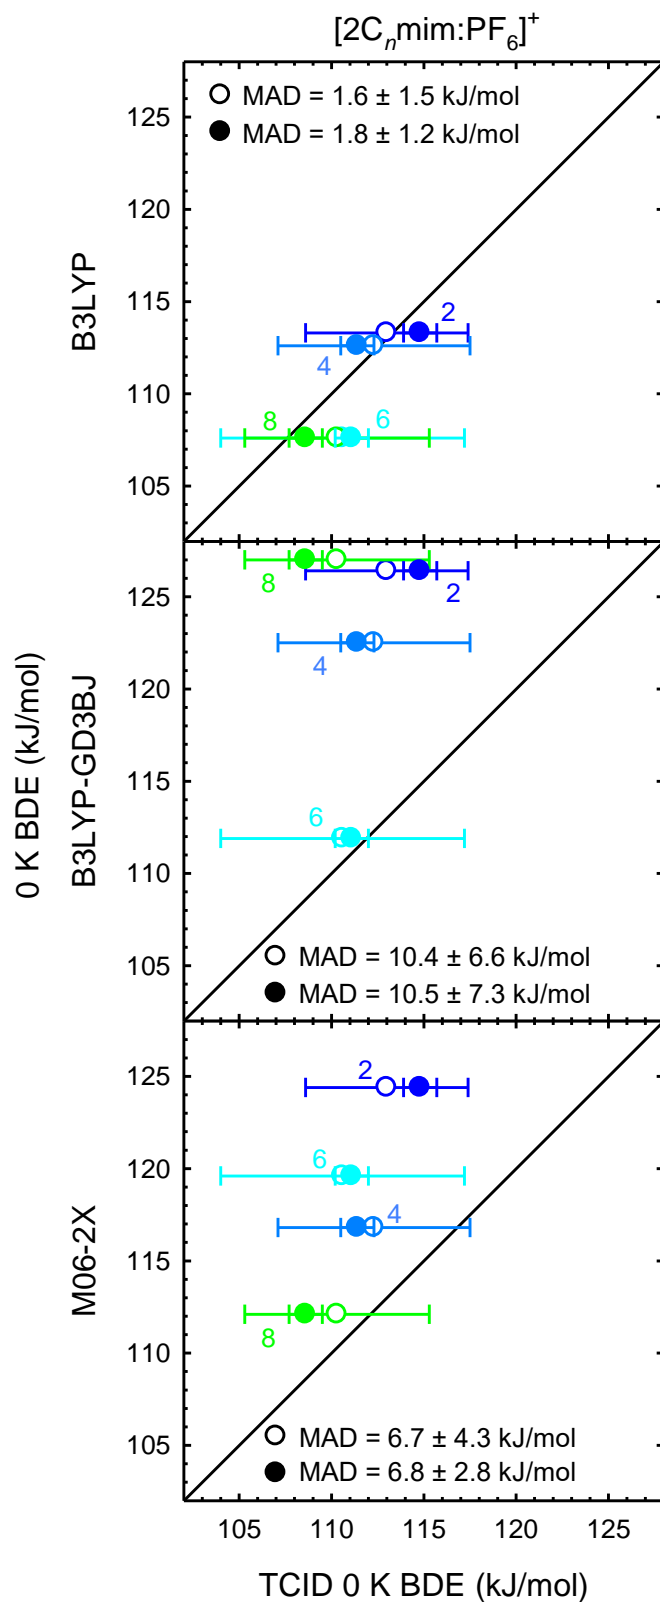

Supplement: d1cp02928b1.pdf [file d1cp02928b1.pdf]
